# Supplementary material for: Synthesis and bioactivity of novel xanthone and thioxanthone l-rhamnopyranosides
Source: Royal Society of Chemistry journal article supplement (doi:10.1039/c5ra02846a), 2015-01-01
Supplement: c5ra02846a1.pdf [file c5ra02846a1.pdf]

## **Synthesis and Bioactivity of Novel Xanthone and Thioxanthone L-Rhamnopyranosides**

Gao-Peng Song<sup>†,#,\*</sup>, Su-Mei Li<sup>‡,#</sup>, Hong-Zong Si<sup>§</sup>, Yi-Bin Li<sup>†</sup>, Ya-sheng Li<sup>†</sup>, Ji-Hong Fan<sup>†</sup>, Qian-Qian Liang<sup>†</sup>, Hui-bing He<sup>†</sup>, Han-Ming Ye<sup>†</sup>, Zi-Ning Cui<sup>†,\*</sup>

<sup>†</sup> Guangdong Province Key Laboratory of Microbial Signals and Disease Control, College of Resource and Environment, South China Agricultural University, Guangzhou 510642, China

<sup>‡</sup> Department of human anatomy, School of Medicine, Jinan University, Guangzhou, 510632, China;

<sup>§</sup> Institute for Computational Science and Engineering, School of Pharmacy, Qingdao University, Qingdao, 266071, China.

\* To whom Correspondence should be addressed. Tel: +86 20 85280293, Fax: +86 20 85280292; E-mail: [vinsin1021@126.com](mailto:vinsin1021@126.com) (G. P. Song), [ziningcui@scau.edu.cn](mailto:ziningcui@scau.edu.cn) (Z. N. Cui).

# These authors contributed equally to this work

## Supporting Information

### <sup>1</sup>H NMR and <sup>13</sup>C NMR spectra

|       |                                                                  |
|-------|------------------------------------------------------------------|
| S1-S2 | List of Contents                                                 |
| S3    | <sup>1</sup> H NMR and <sup>13</sup> C NMR of compound <b>13</b> |
| S4    | <sup>1</sup> H NMR and <sup>13</sup> C NMR of compound <b>14</b> |
| S5    | <sup>1</sup> H NMR and <sup>13</sup> C NMR of compound <b>16</b> |
| S6    | <sup>1</sup> H NMR and <sup>13</sup> C NMR of compound <b>17</b> |
| S7    | <sup>1</sup> H NMR and <sup>13</sup> C NMR of compound <b>18</b> |
| S8    | <sup>1</sup> H NMR and <sup>13</sup> C NMR of compound <b>19</b> |
| S9    | <sup>1</sup> H NMR and <sup>13</sup> C NMR of compound <b>35</b> |
| S10   | <sup>1</sup> H NMR and <sup>13</sup> C NMR of compound <b>36</b> |
| S11   | <sup>1</sup> H NMR and <sup>13</sup> C NMR of compound <b>37</b> |
| S12   | <sup>1</sup> H NMR and <sup>13</sup> C NMR of compound <b>38</b> |
| S13   | <sup>1</sup> H NMR and <sup>13</sup> C NMR of compound <b>1</b>  |
| S14   | <sup>1</sup> H NMR and <sup>13</sup> C NMR of compound <b>2</b>  |
| S15   | <sup>1</sup> H NMR and <sup>13</sup> C NMR of compound <b>3</b>  |
| S16   | <sup>1</sup> H NMR and <sup>13</sup> C NMR of compound <b>4</b>  |
| S17   | <sup>1</sup> H NMR and <sup>13</sup> C NMR of compound <b>5</b>  |
| S18   | <sup>1</sup> H NMR and <sup>13</sup> C NMR of compound <b>6</b>  |
| S19   | <sup>1</sup> H NMR and <sup>13</sup> C NMR of compound <b>7</b>  |
| S20   | <sup>1</sup> H NMR and <sup>13</sup> C NMR of compound <b>20</b> |
| S21   | <sup>1</sup> H NMR and <sup>13</sup> C NMR of compound <b>21</b> |
| S22   | <sup>1</sup> H NMR and <sup>13</sup> C NMR of compound <b>22</b> |
| S23   | <sup>1</sup> H NMR and <sup>13</sup> C NMR of compound <b>23</b> |
| S24   | <sup>1</sup> H NMR and <sup>13</sup> C NMR of compound <b>24</b> |
| S25   | <sup>1</sup> H NMR and <sup>13</sup> C NMR of compound <b>25</b> |
| S26   | <sup>1</sup> H NMR and <sup>13</sup> C NMR of compound <b>26</b> |
| S27   | <sup>1</sup> H NMR and <sup>13</sup> C NMR of compound <b>27</b> |

|     |                                                                  |
|-----|------------------------------------------------------------------|
| S28 | <sup>1</sup> H NMR and <sup>13</sup> C NMR of compound <b>28</b> |
| S29 | <sup>1</sup> H NMR and <sup>13</sup> C NMR of compound <b>29</b> |
| S30 | <sup>1</sup> H NMR and <sup>13</sup> C NMR of compound <b>30</b> |
| S31 | <sup>1</sup> H NMR and <sup>13</sup> C NMR of compound <b>31</b> |
| S32 | <sup>1</sup> H NMR and <sup>13</sup> C NMR of compound <b>32</b> |
| S33 | <sup>1</sup> H NMR and <sup>13</sup> C NMR of compound <b>33</b> |
| S34 | <sup>1</sup> H NMR and <sup>13</sup> C NMR of compound <b>8</b>  |
| S35 | <sup>1</sup> H NMR and <sup>13</sup> C NMR of compound <b>9</b>  |
| S36 | <sup>1</sup> H NMR and <sup>13</sup> C NMR of compound <b>10</b> |
| S37 | <sup>1</sup> H NMR and <sup>13</sup> C NMR of compound <b>11</b> |

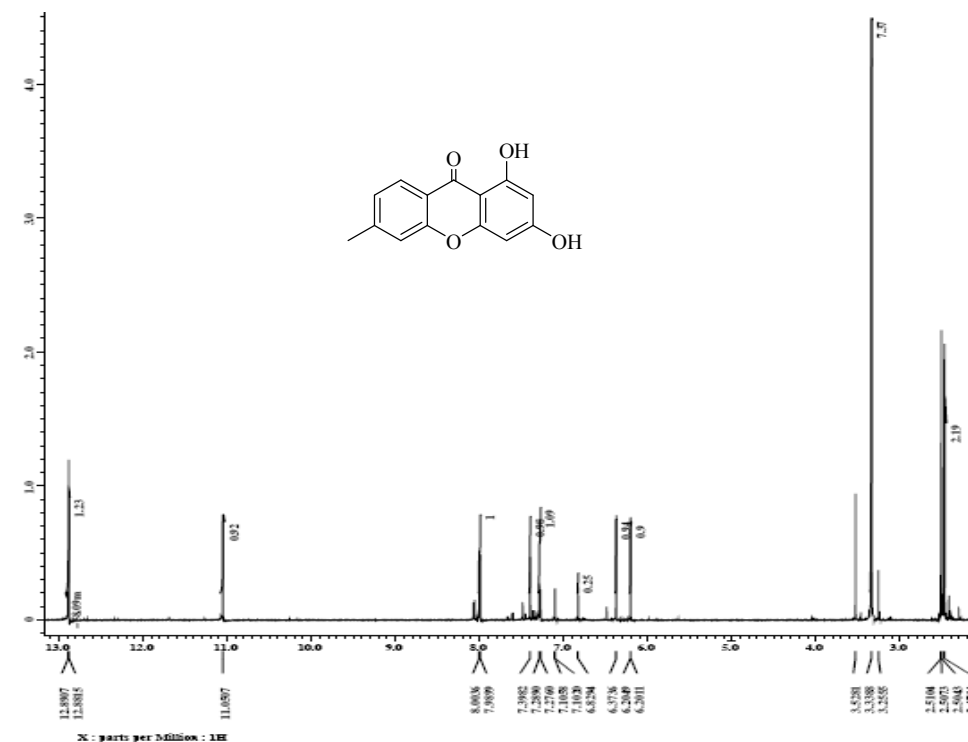

<sup>1</sup>H NMR spectra of compound of 13

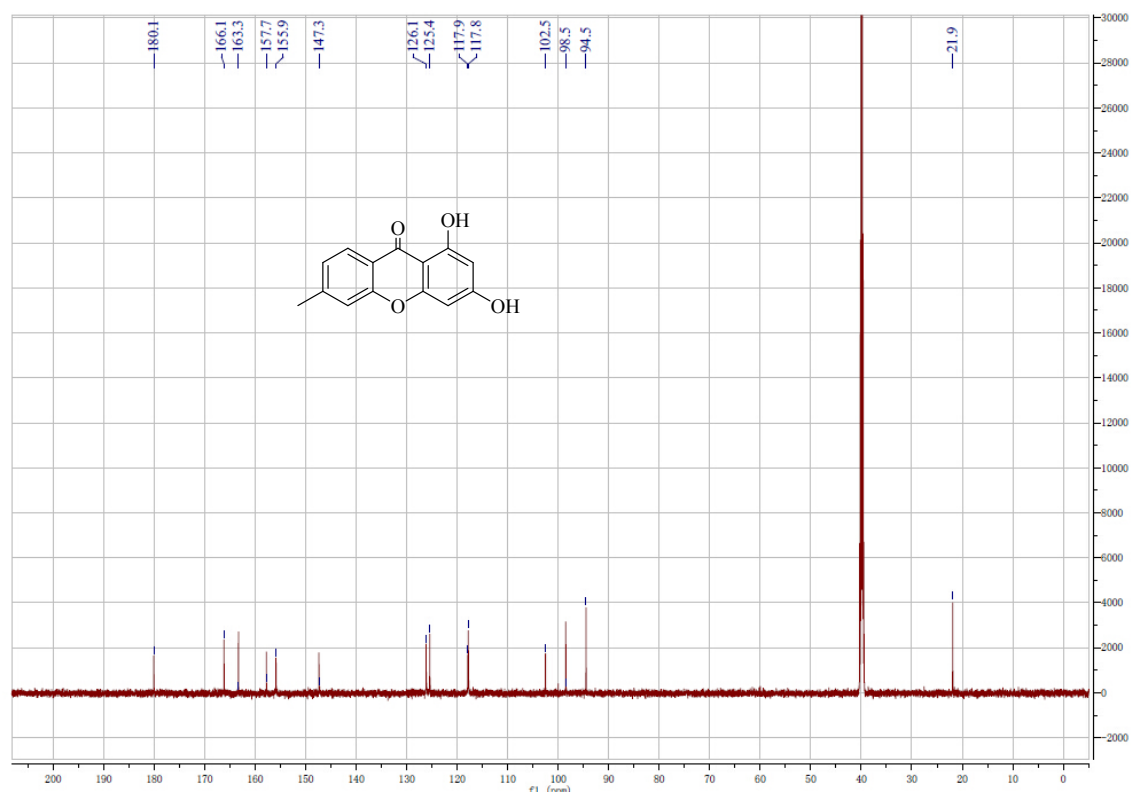

<sup>13</sup>C NMR spectra of compound of 13

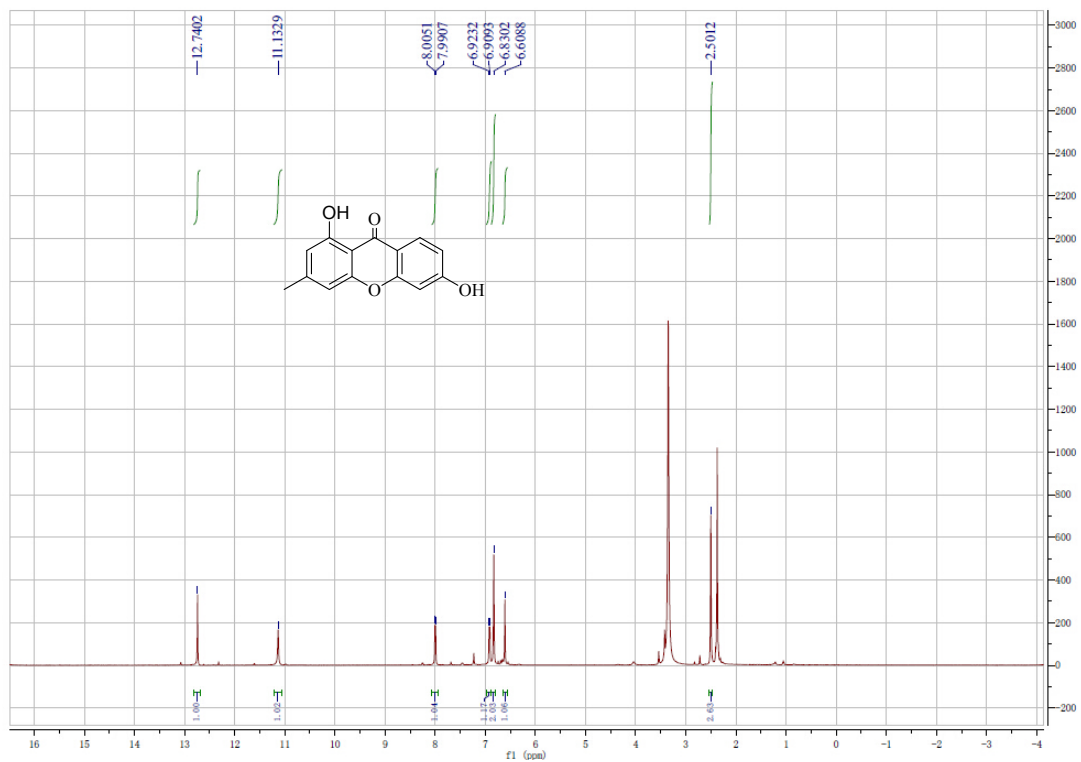

<sup>1</sup>H NMR spectra of compound of 14

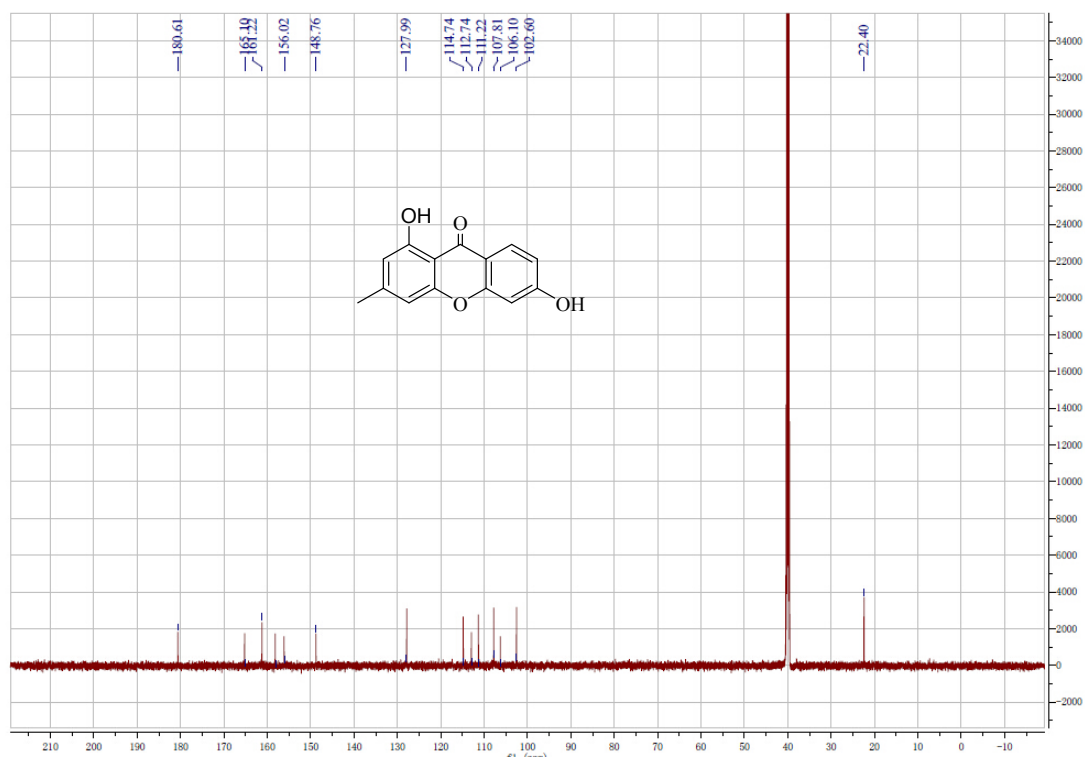

<sup>13</sup>C NMR spectra of compound of 14

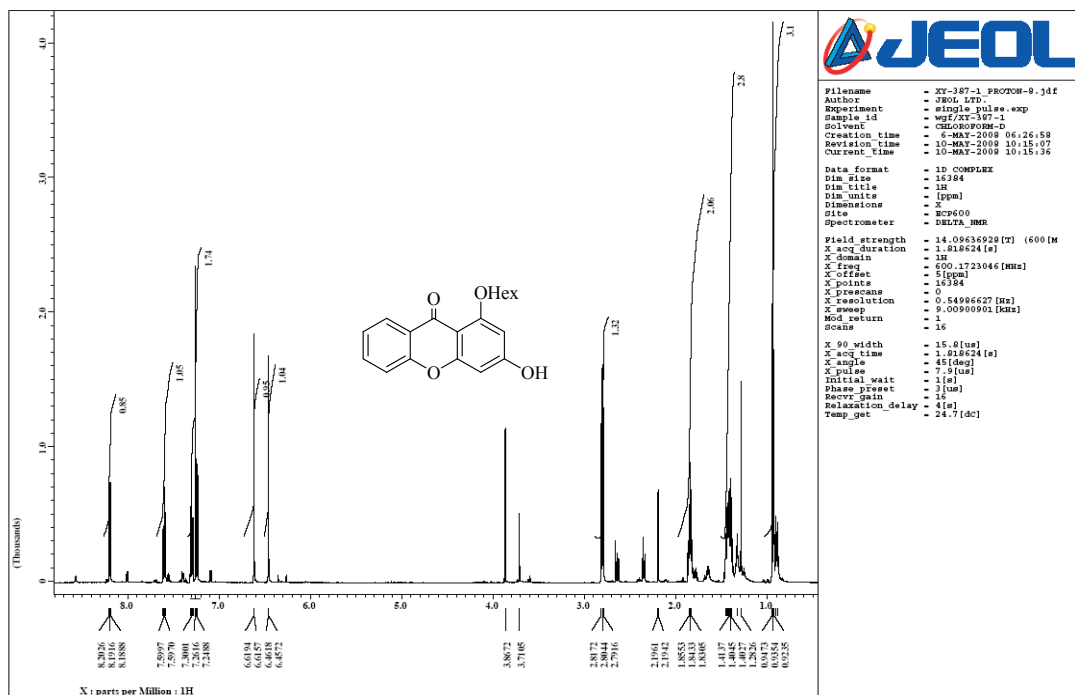

<sup>1</sup>H NMR spectra of compound of 16

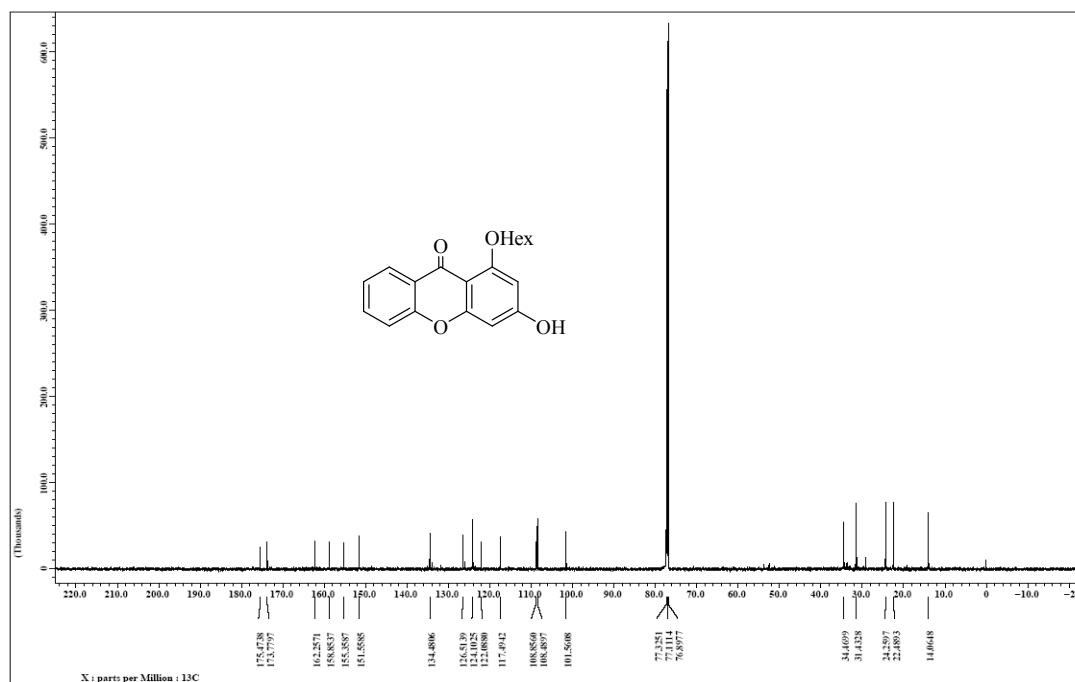

<sup>13</sup>C NMR spectra of compound of 16

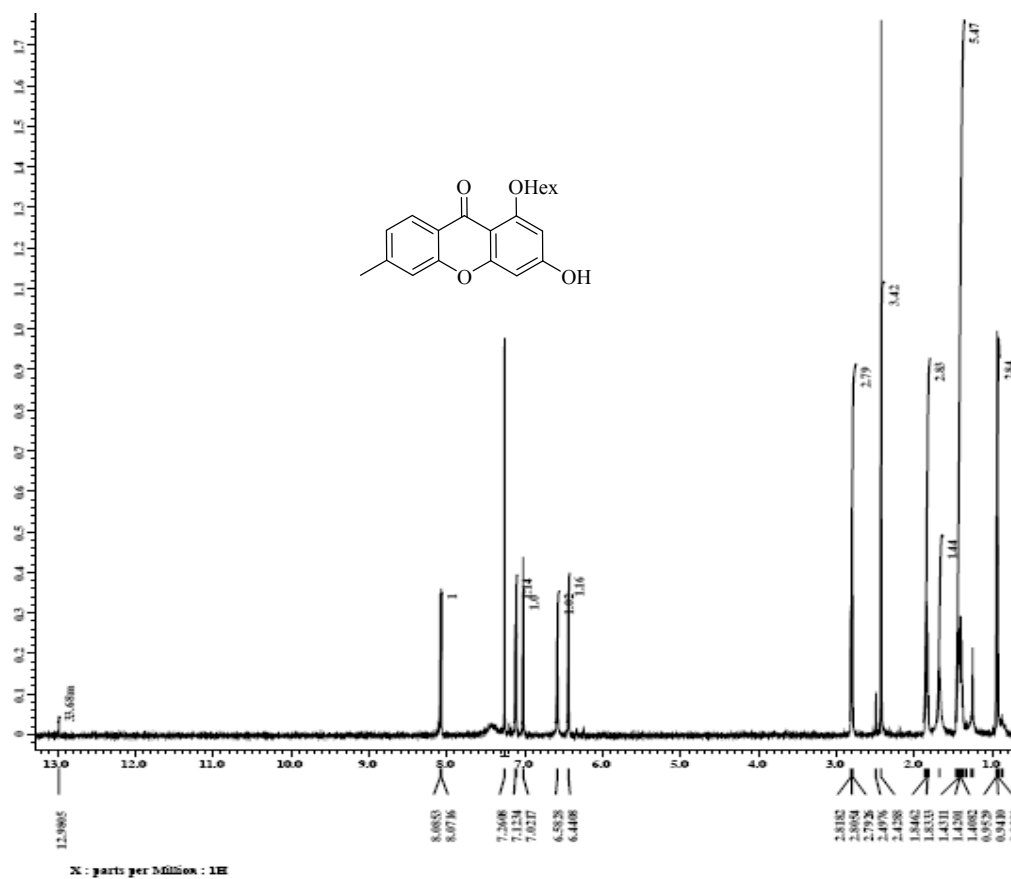

<sup>1</sup>H NMR spectra of compound of 17

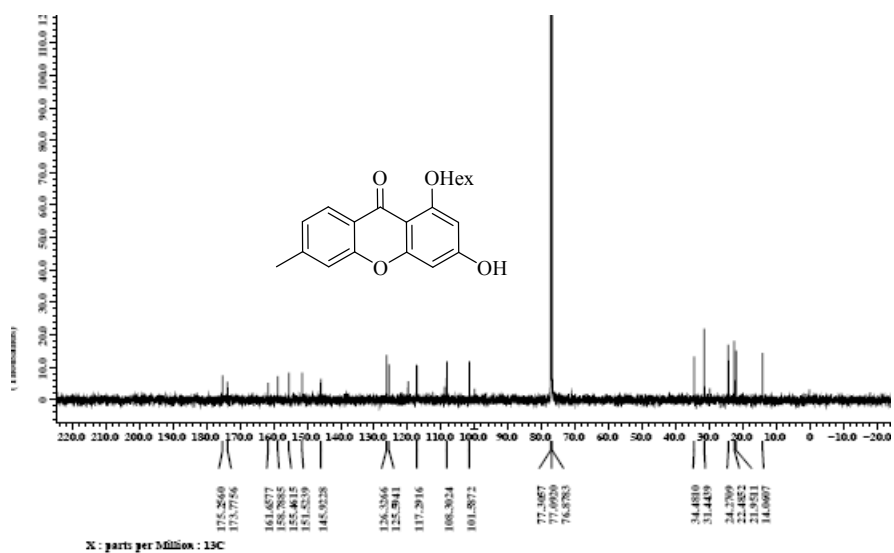

<sup>13</sup>C NMR spectra of compound of 17

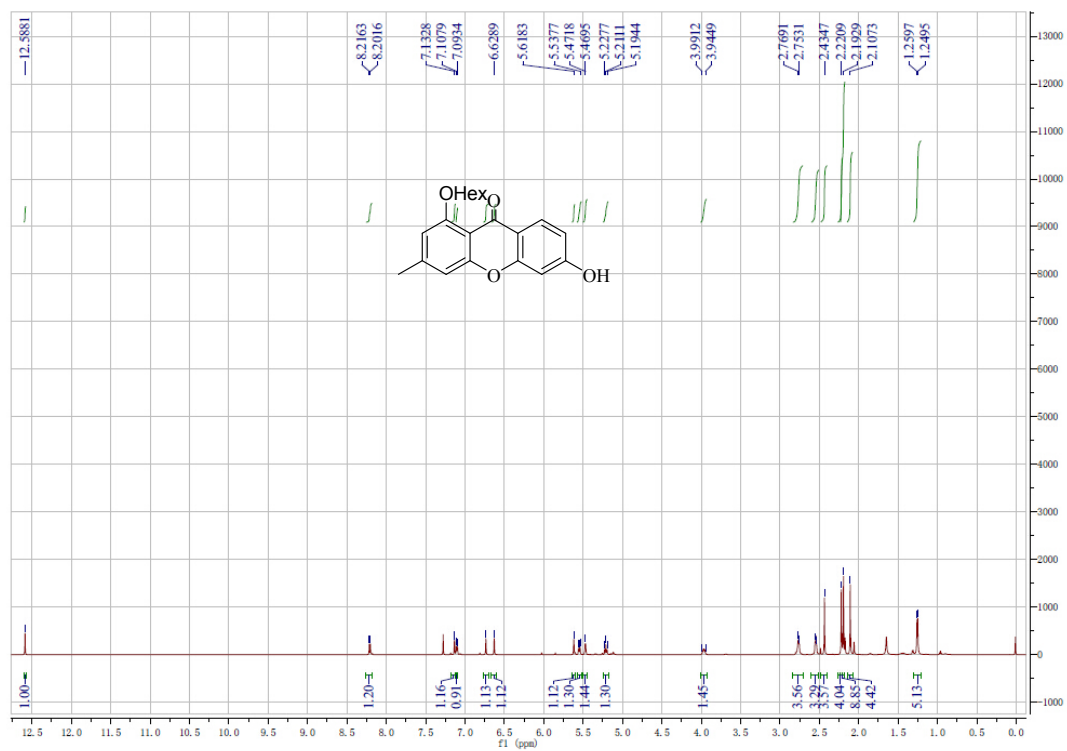

<sup>1</sup>H NMR spectra of compound of **18**

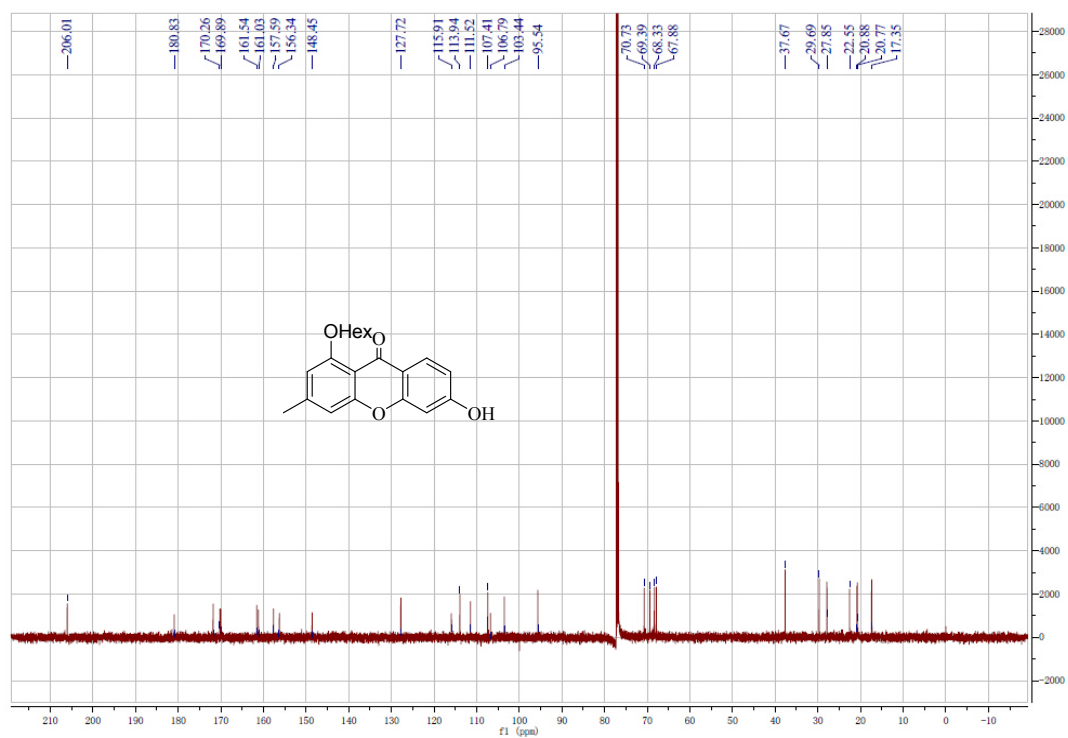

<sup>13</sup>C NMR spectra of compound of **18**



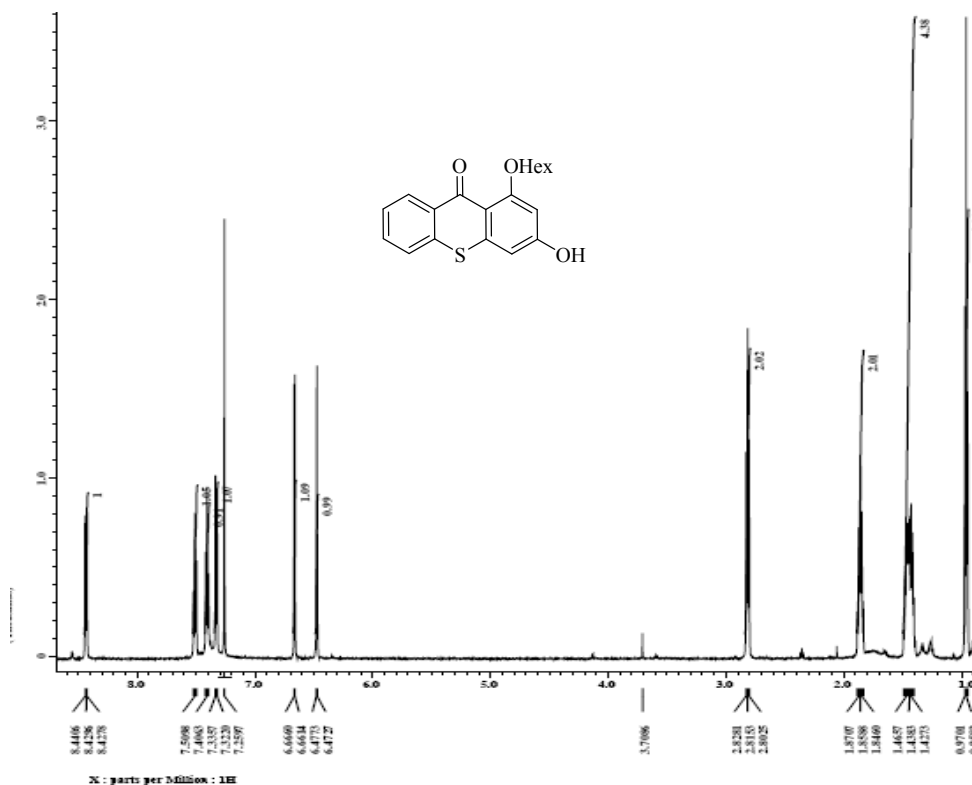

<sup>1</sup>H NMR spectra of compound of 19

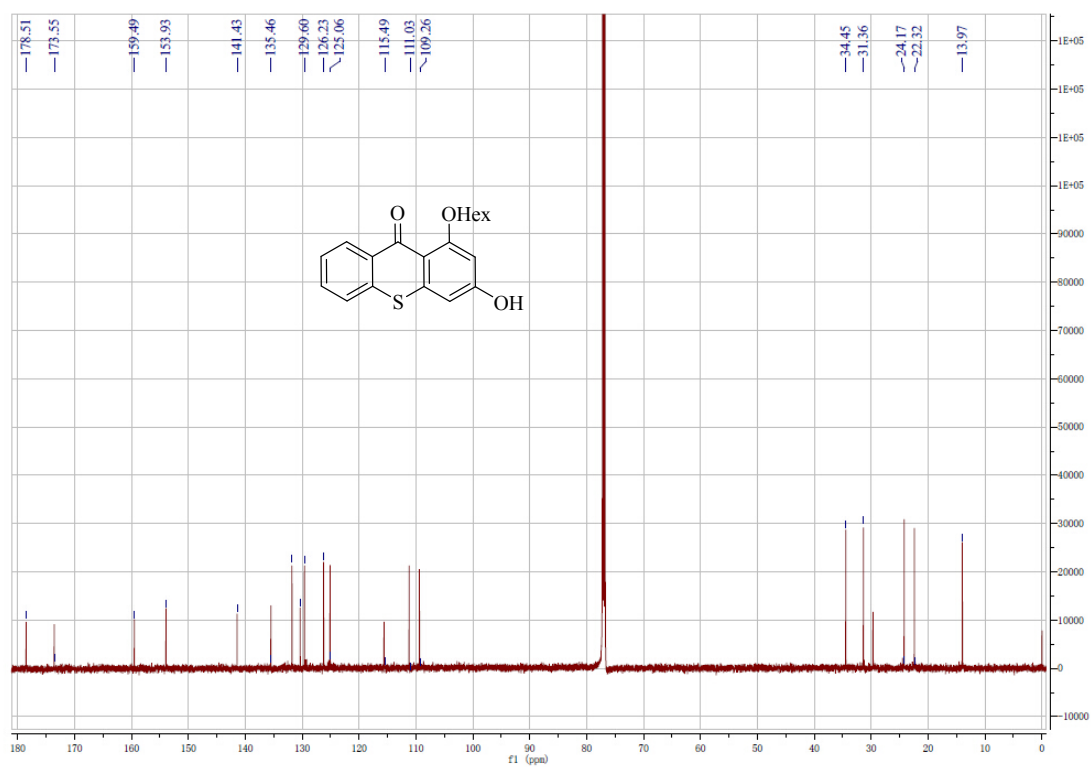

<sup>13</sup>C NMR spectra of compound of 19

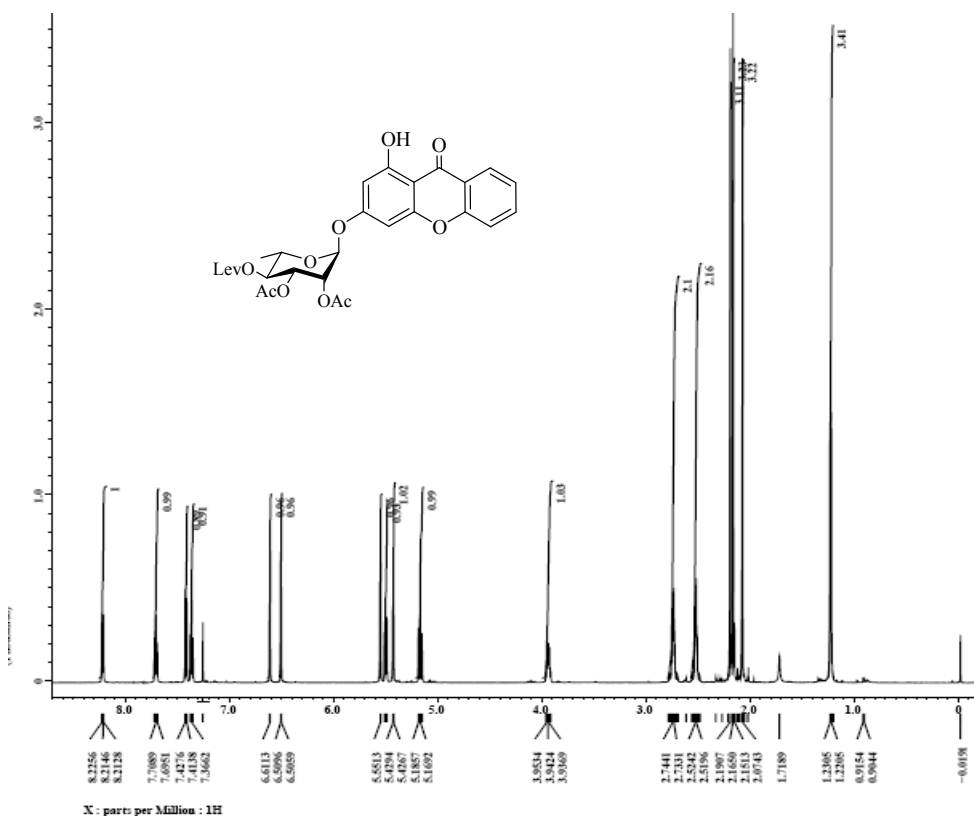

<sup>1</sup>H NMR spectra of compound of **35**

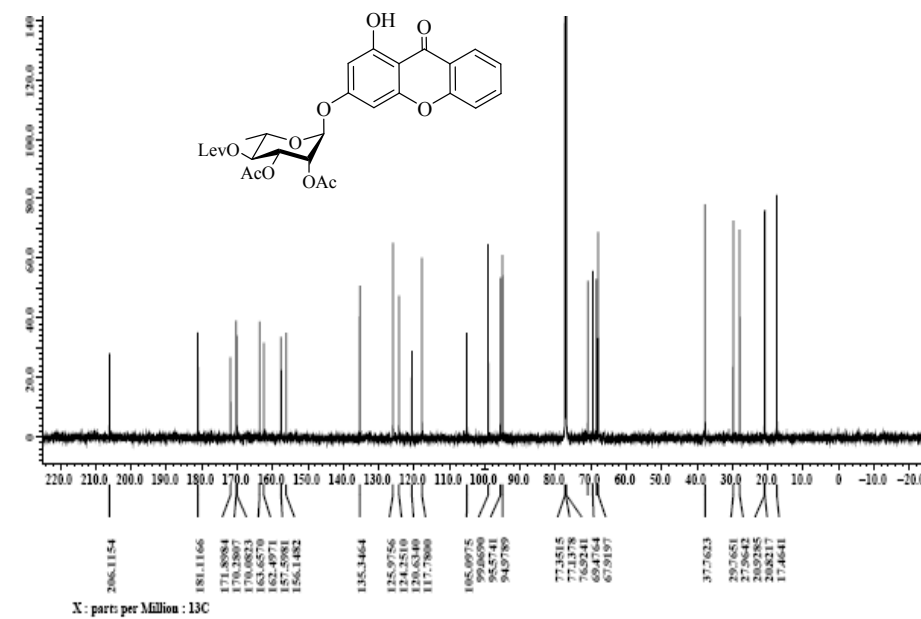

<sup>13</sup>C NMR spectra of compound of **35**

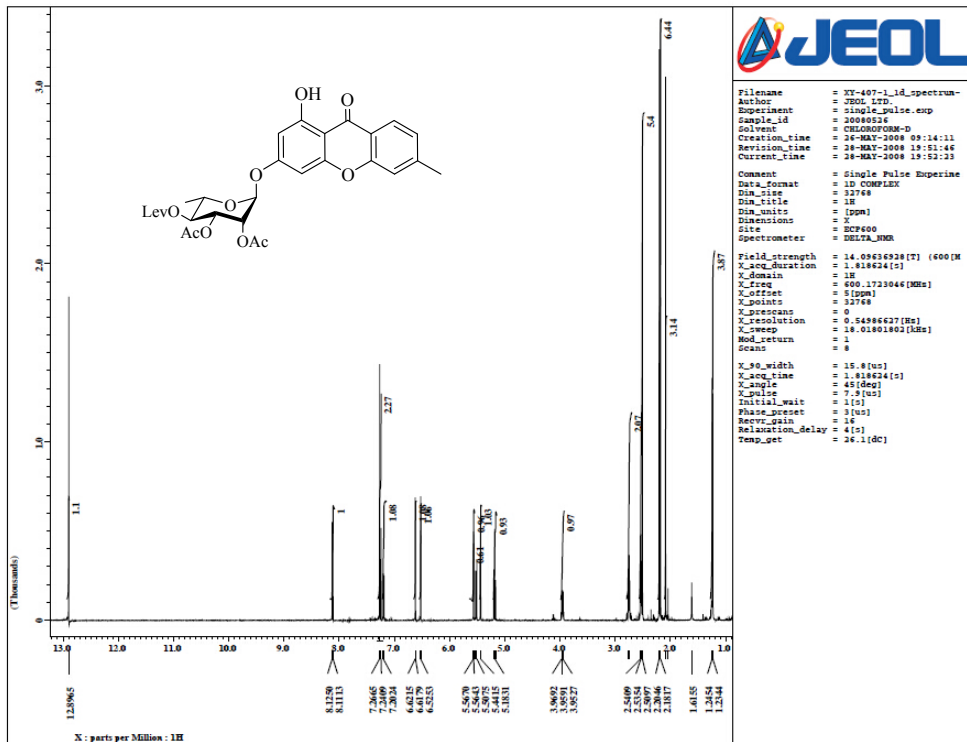

<sup>1</sup>H NMR spectra of compound of 36

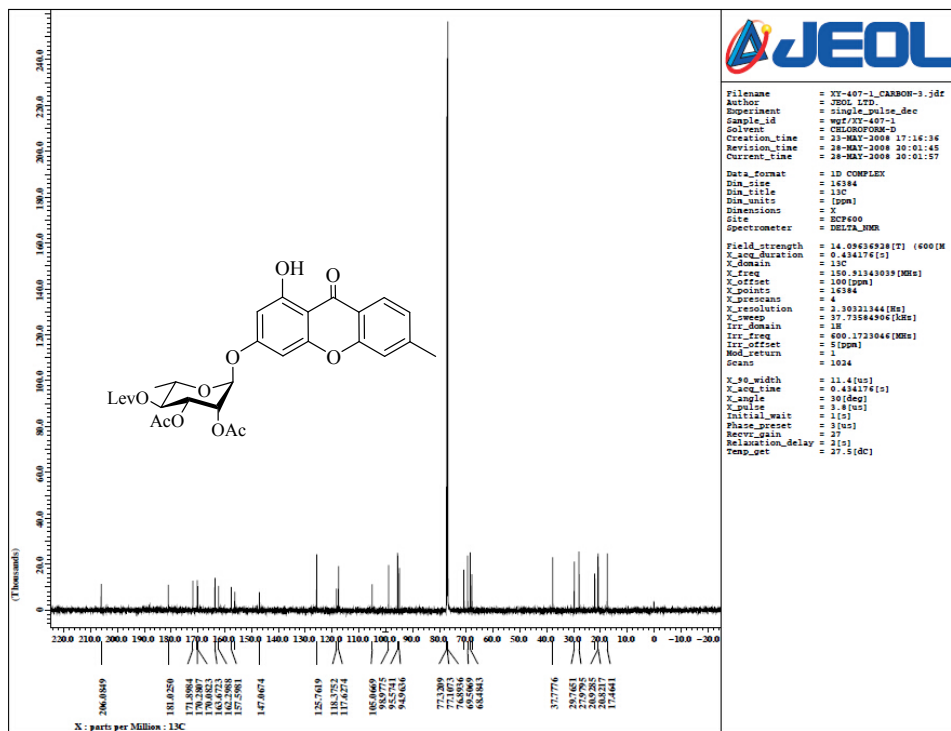

<sup>13</sup>C NMR spectra of compound of 36

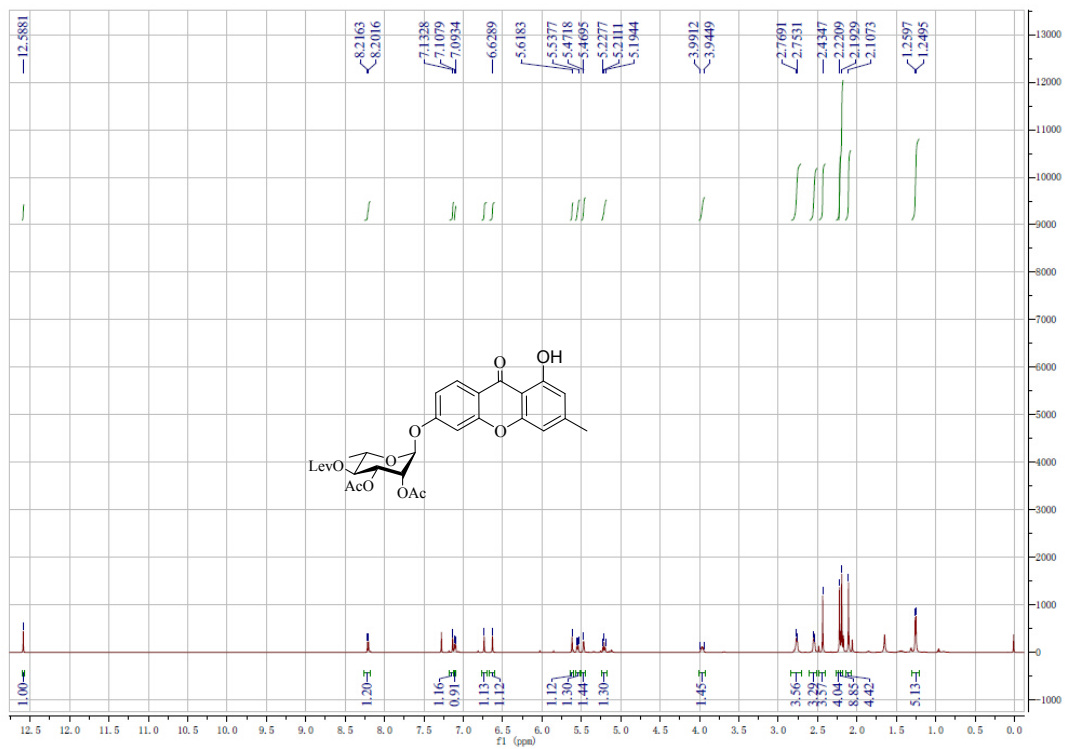

<sup>1</sup>H NMR spectra of compound of **37**

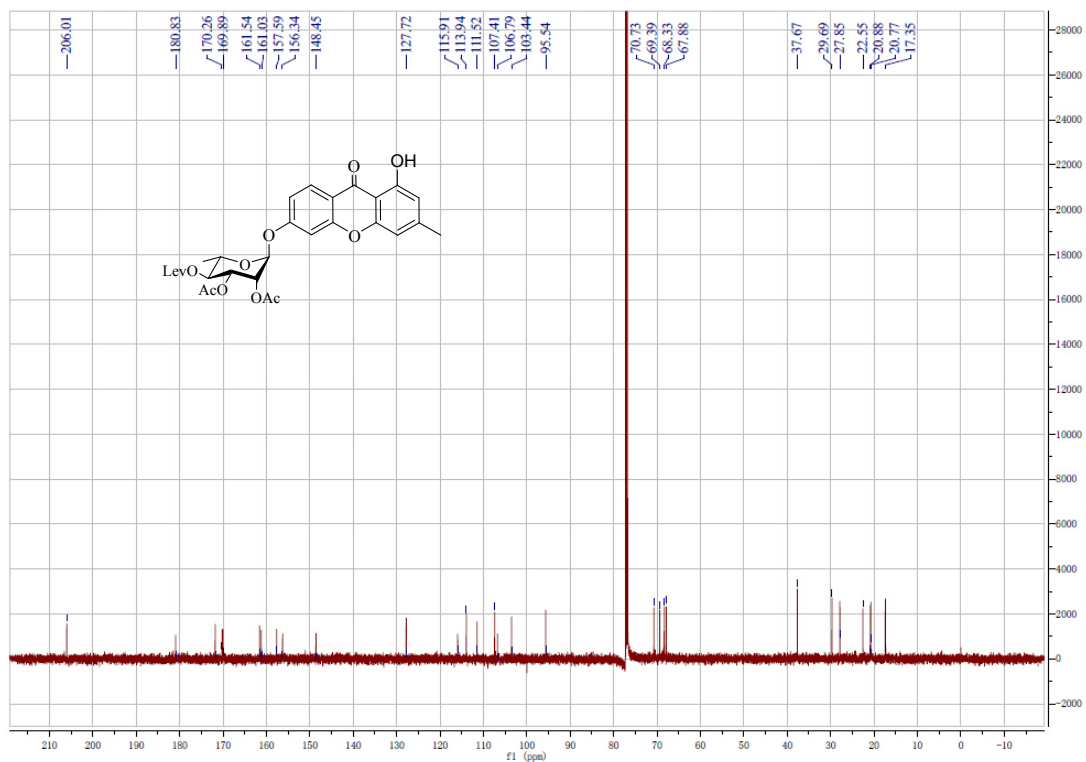

<sup>13</sup>C NMR spectra of compound of **37**

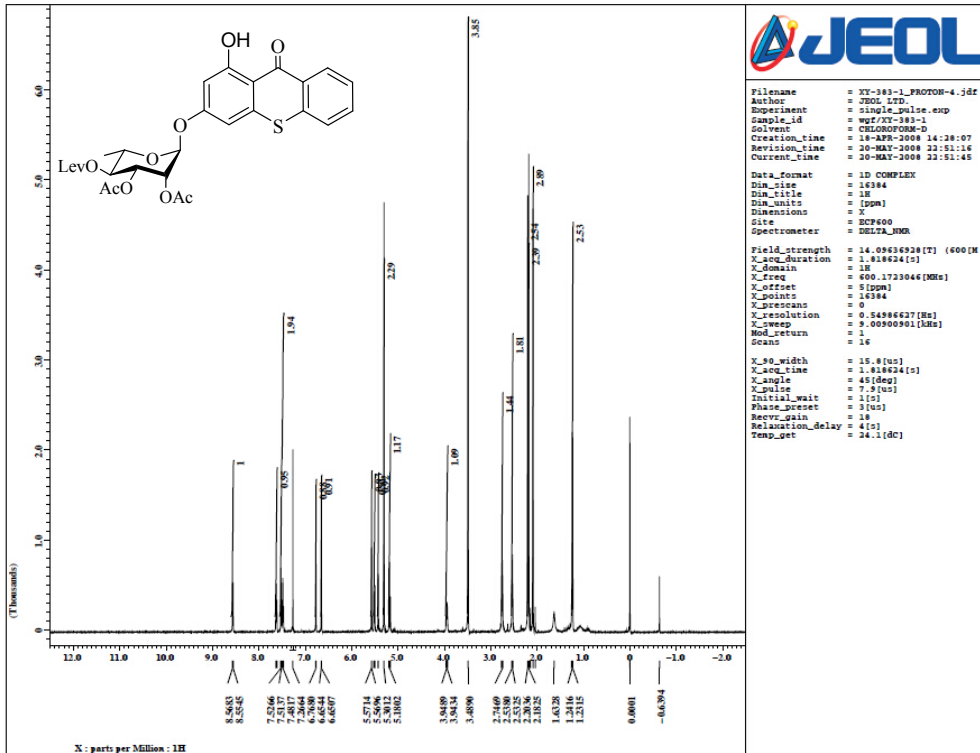

<sup>1</sup>H NMR spectra of compound of 38

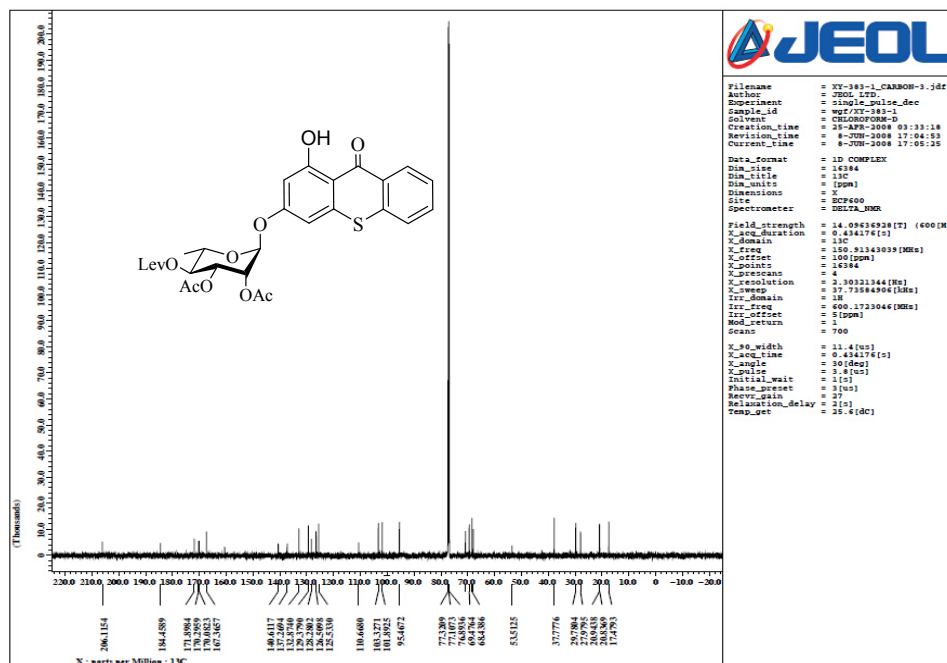

<sup>13</sup>C NMR spectra of compound of 38

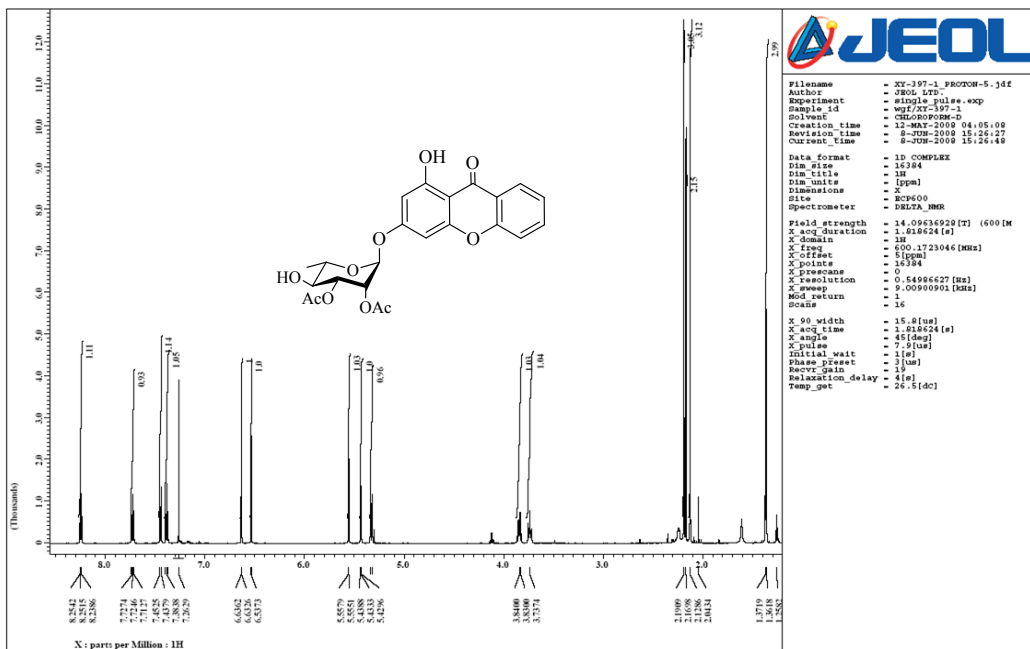

<sup>1</sup>H NMR spectra of compound of 1

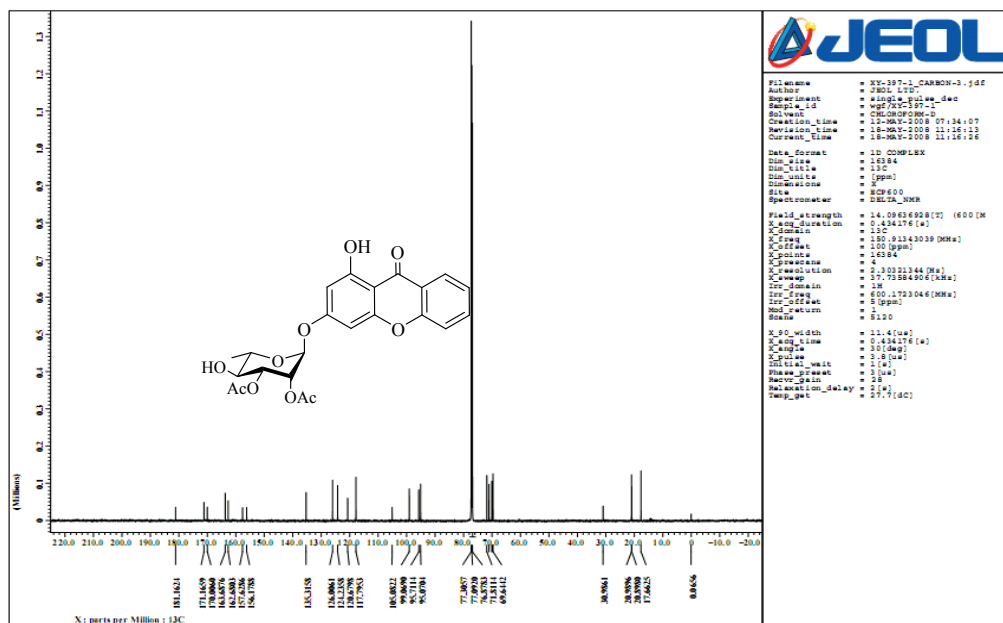

<sup>13</sup>C NMR spectra of compound of 1

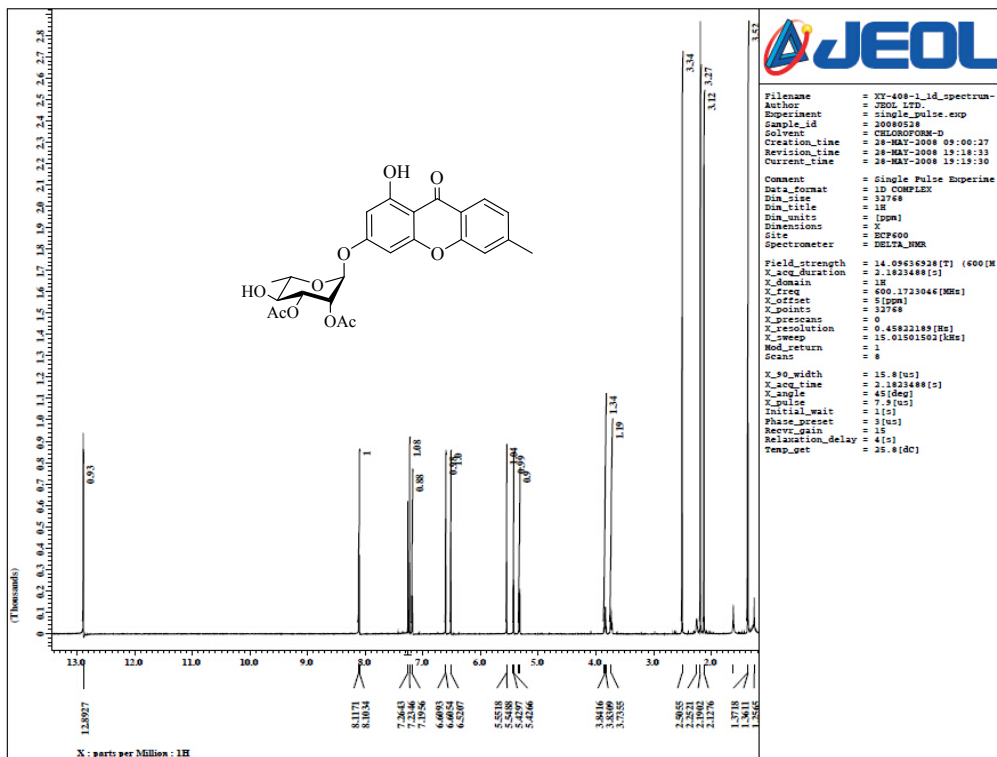

<sup>1</sup>H NMR spectra of compound of 2

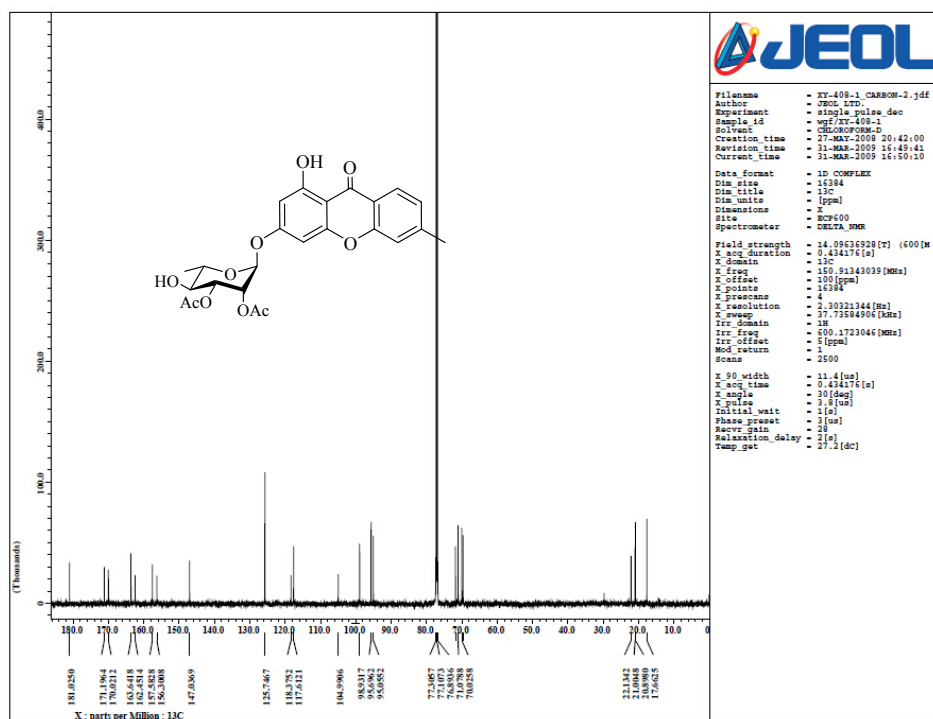

<sup>13</sup>C NMR spectra of compound of 2

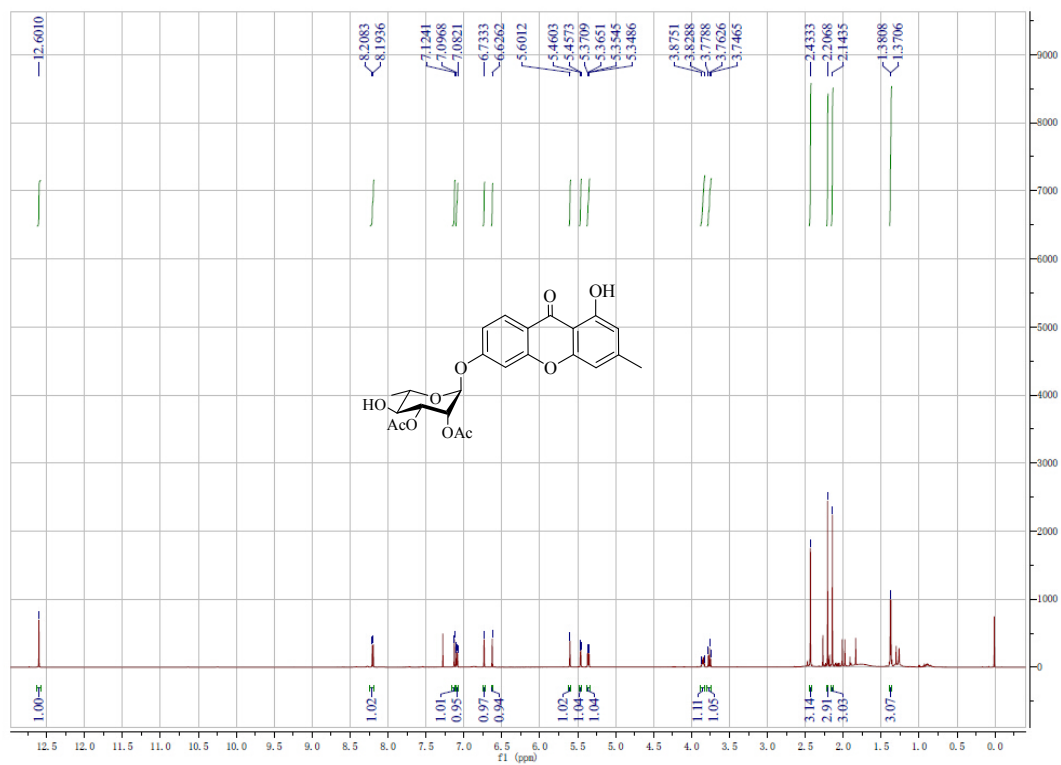

<sup>1</sup>H NMR spectra of compound **3**

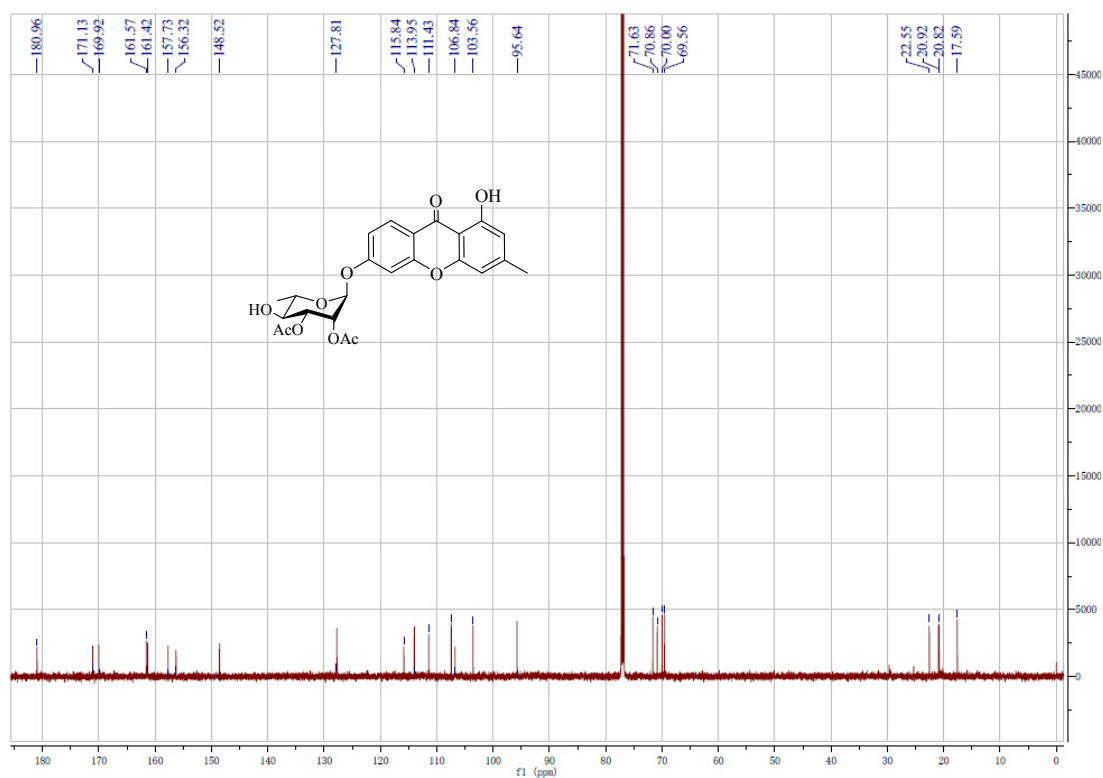

<sup>13</sup>C NMR spectra of compound **3**



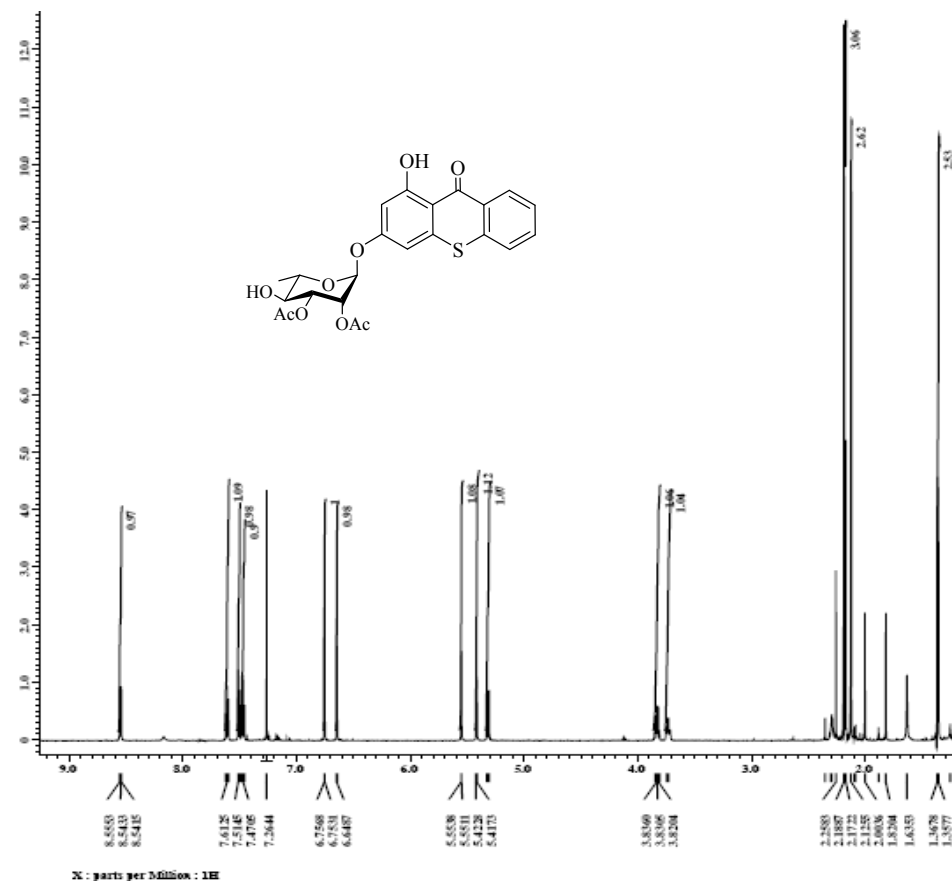

<sup>1</sup>H NMR spectra of compound of 4

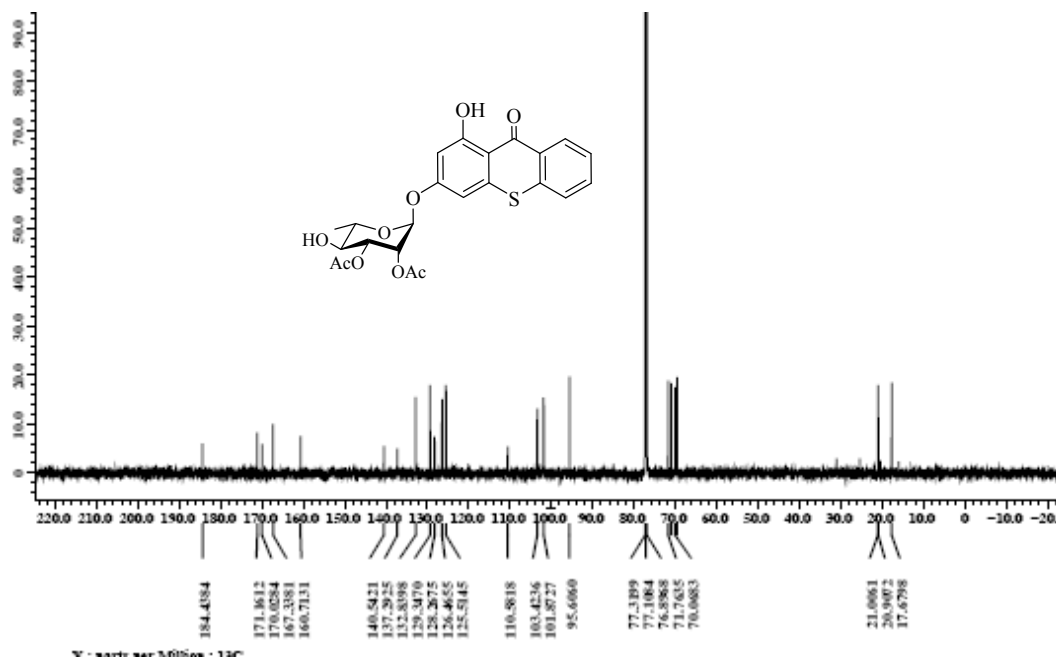

<sup>13</sup>C NMR spectra of compound of 4

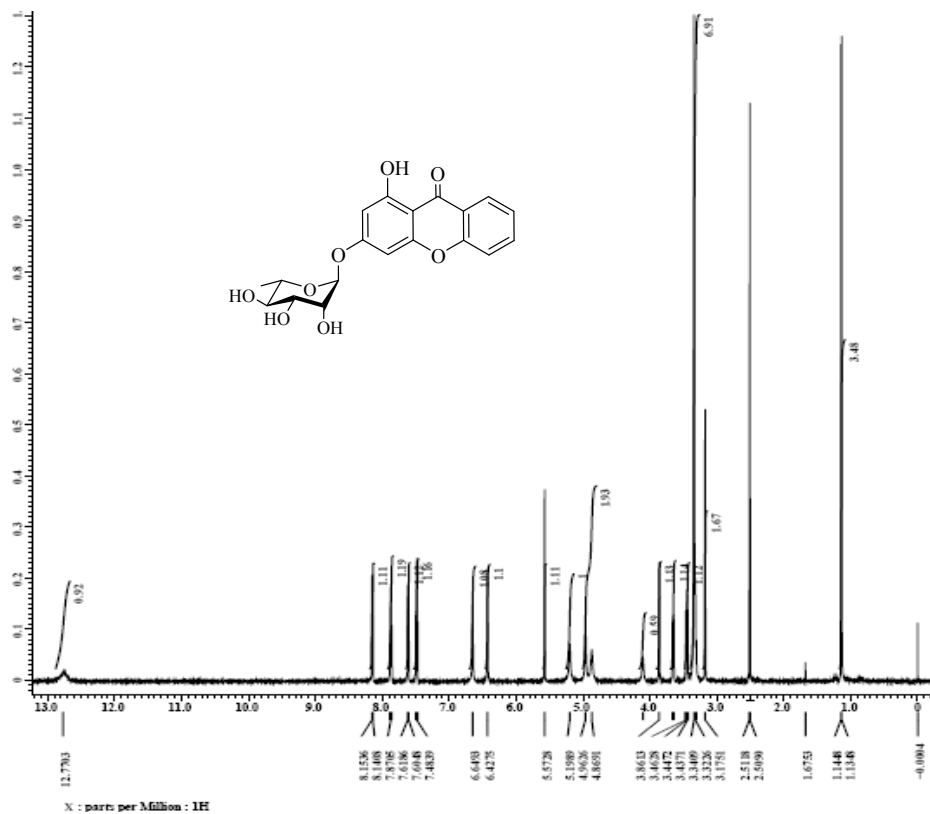

<sup>1</sup>H NMR spectra of compound of 5

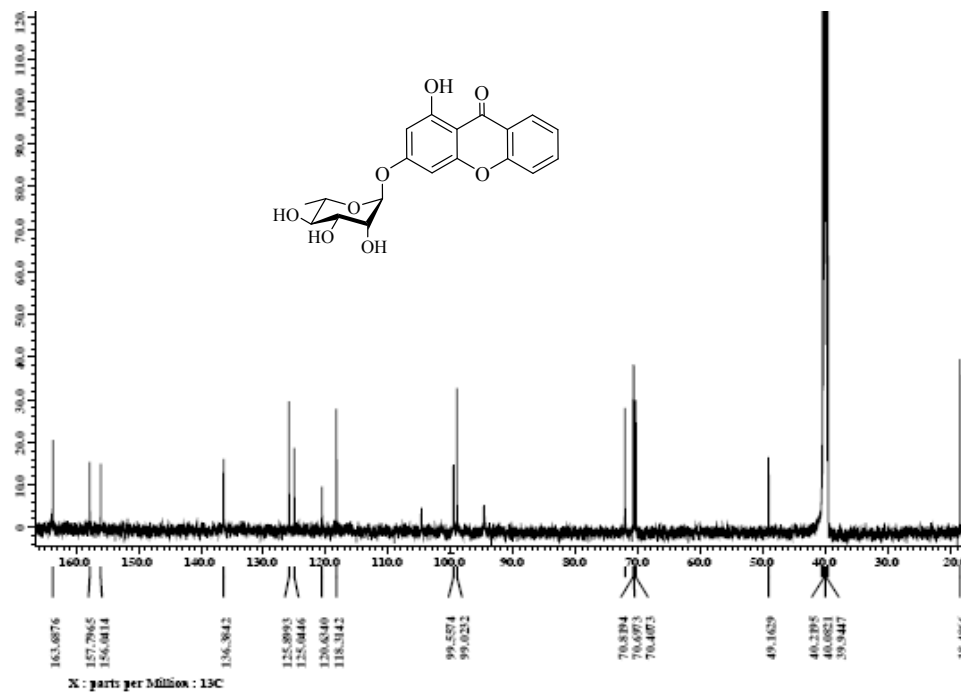

<sup>13</sup>C NMR spectra of compound of 5

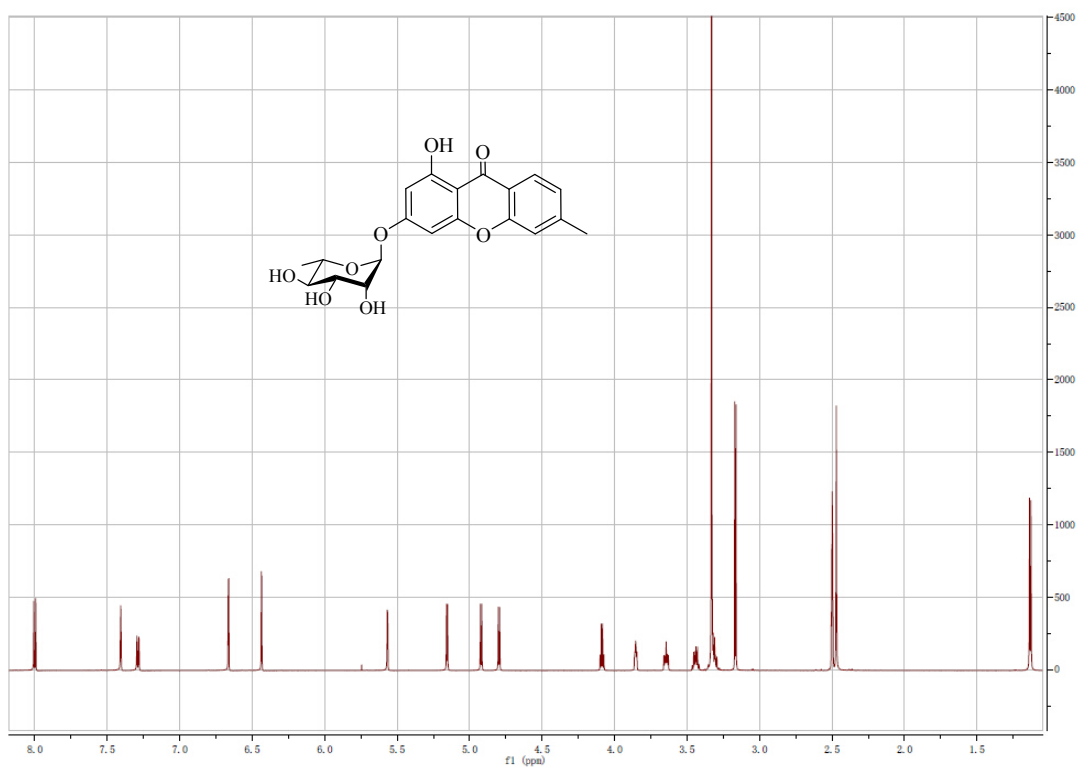

<sup>1</sup>H NMR spectra of compound of **6**

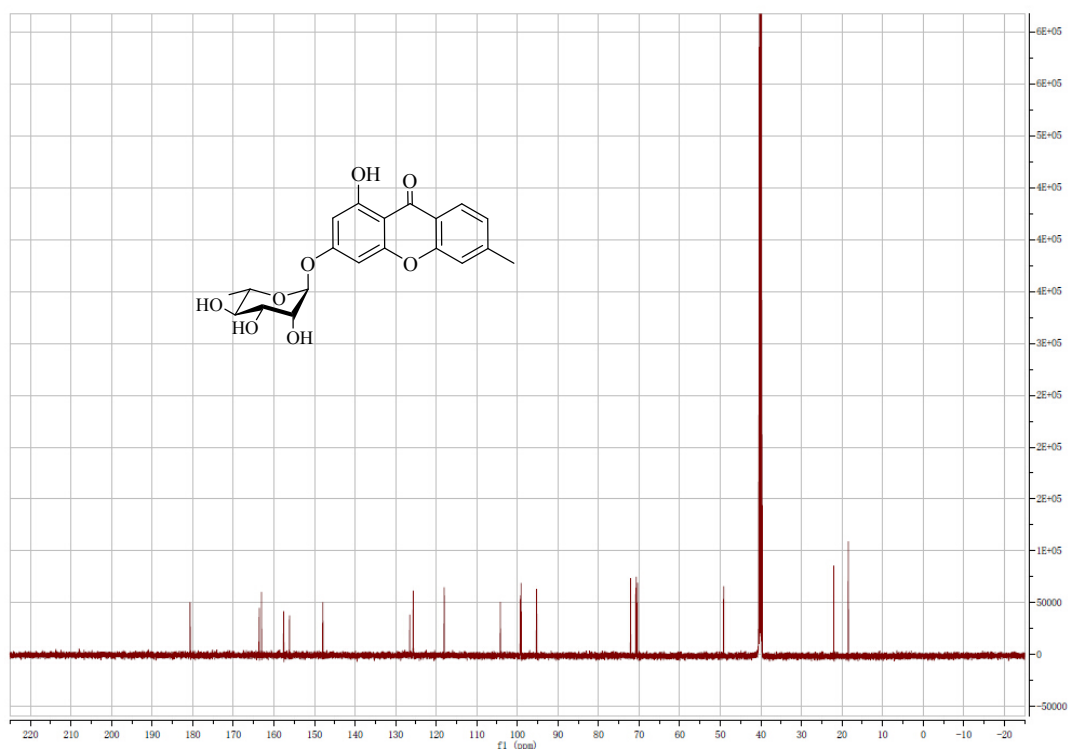

<sup>13</sup>C NMR spectra of compound of **6**

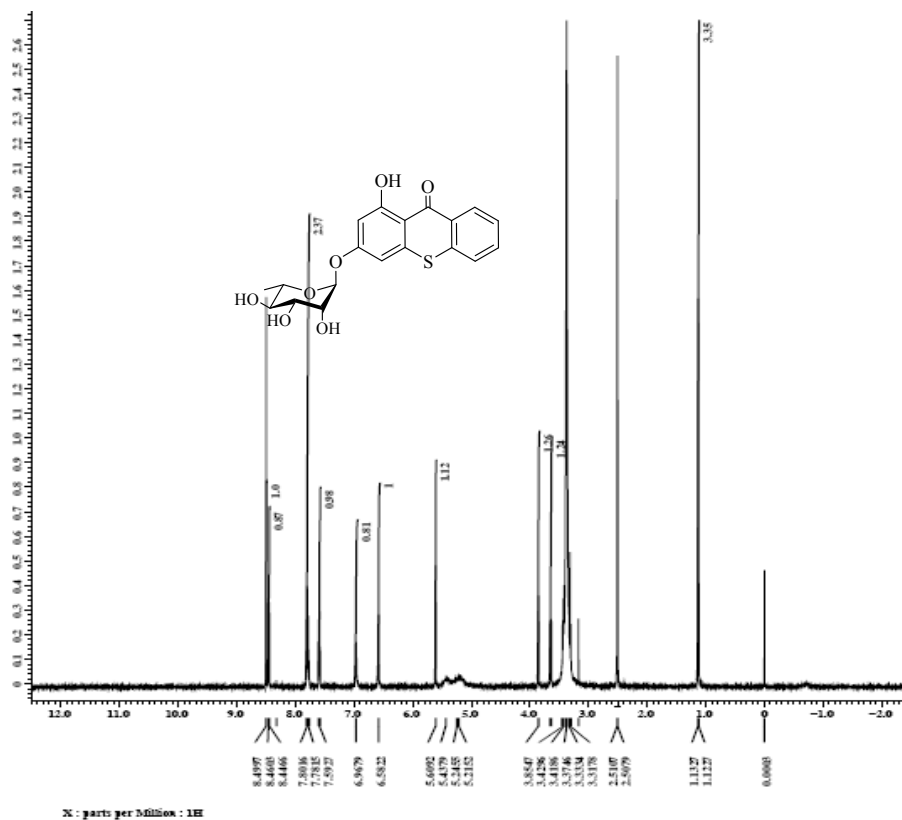

<sup>1</sup>H NMR spectra of compound of 7

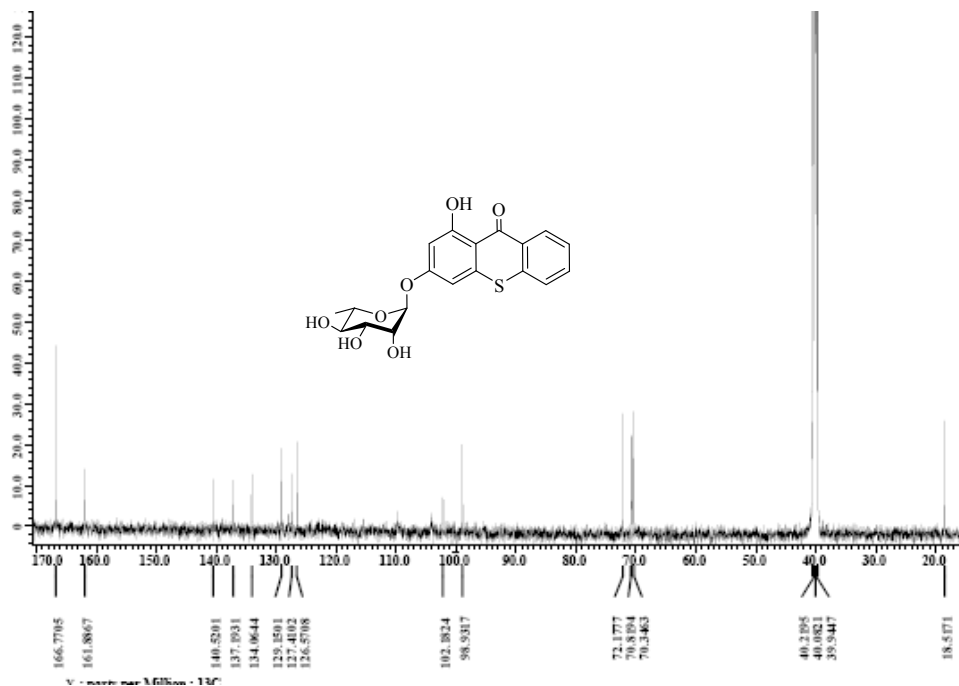

<sup>13</sup>C NMR spectra of compound of 7

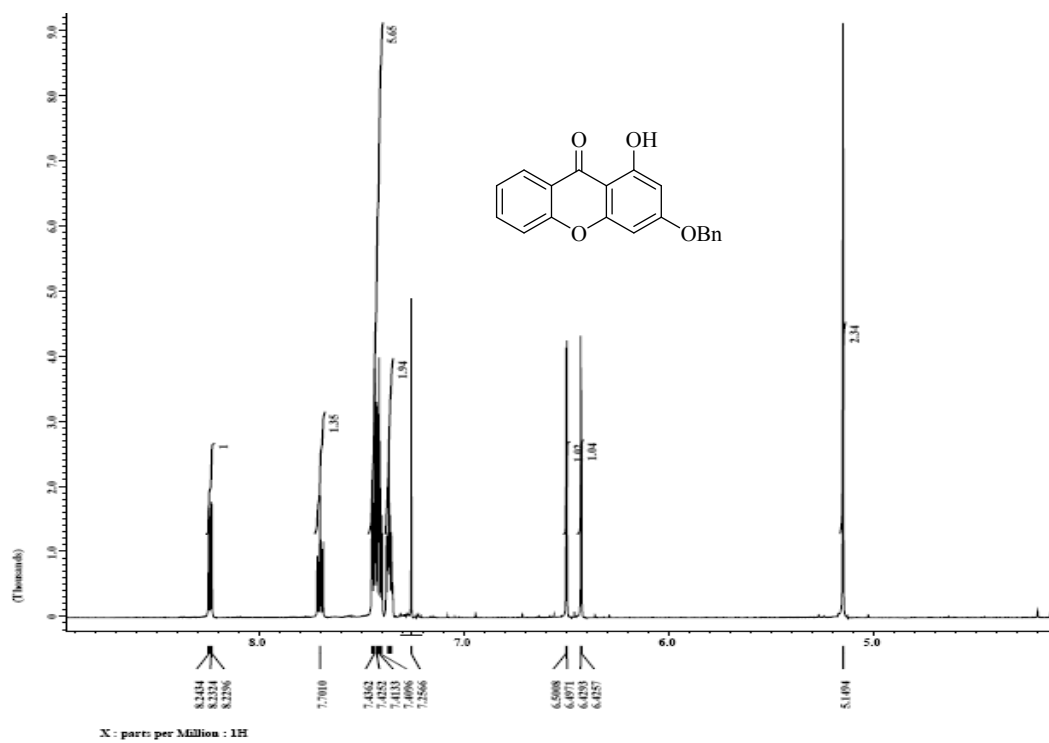

<sup>1</sup>H NMR spectra of compound of 20

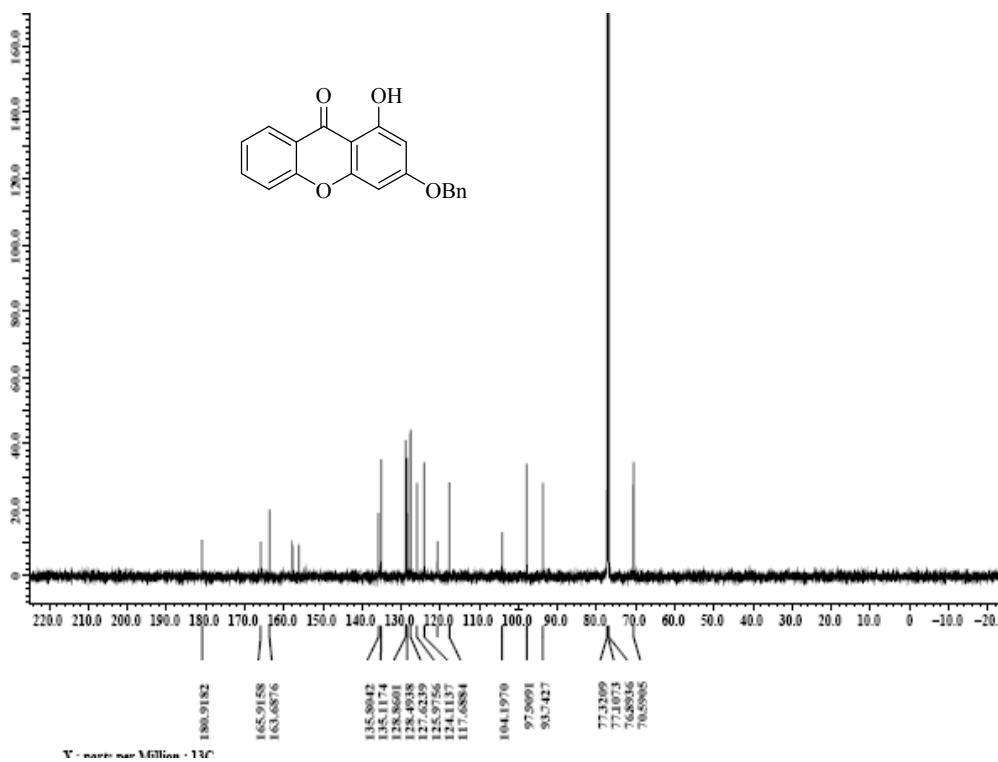

<sup>13</sup>C NMR spectra of compound of 20

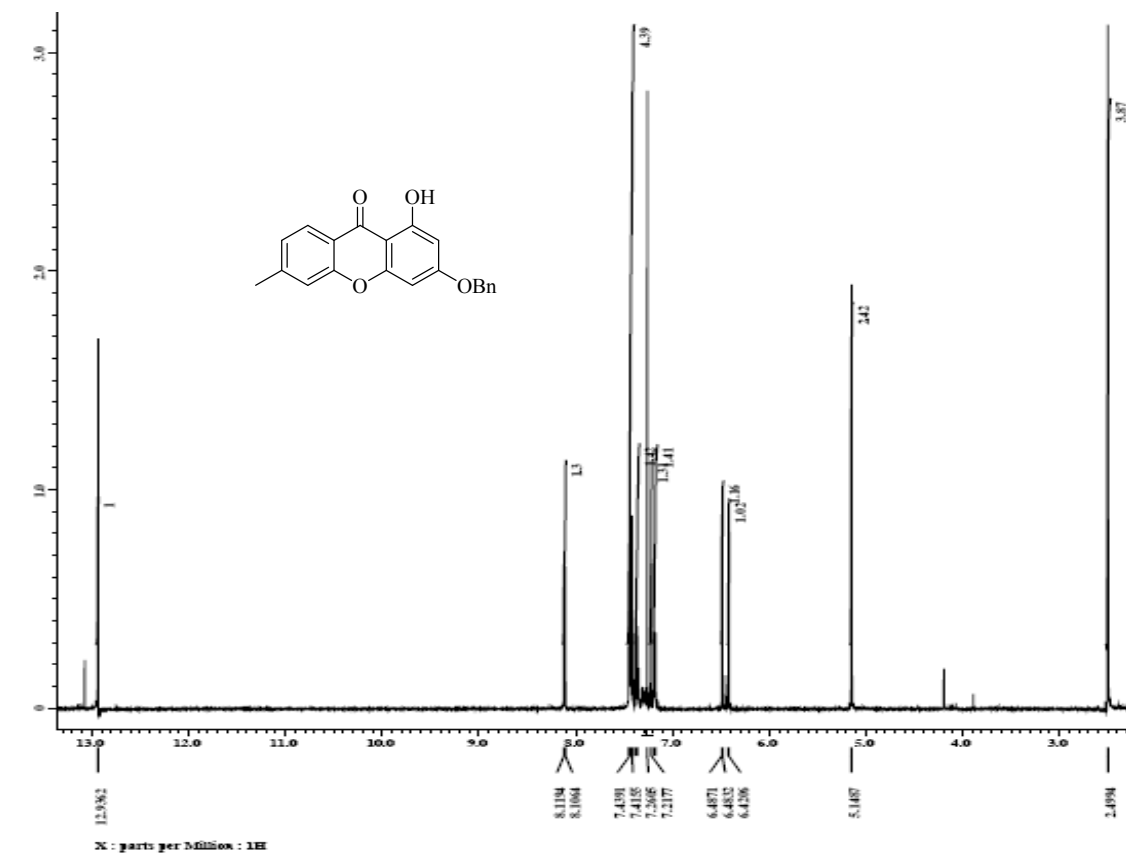

<sup>1</sup>H NMR spectra of compound of 21

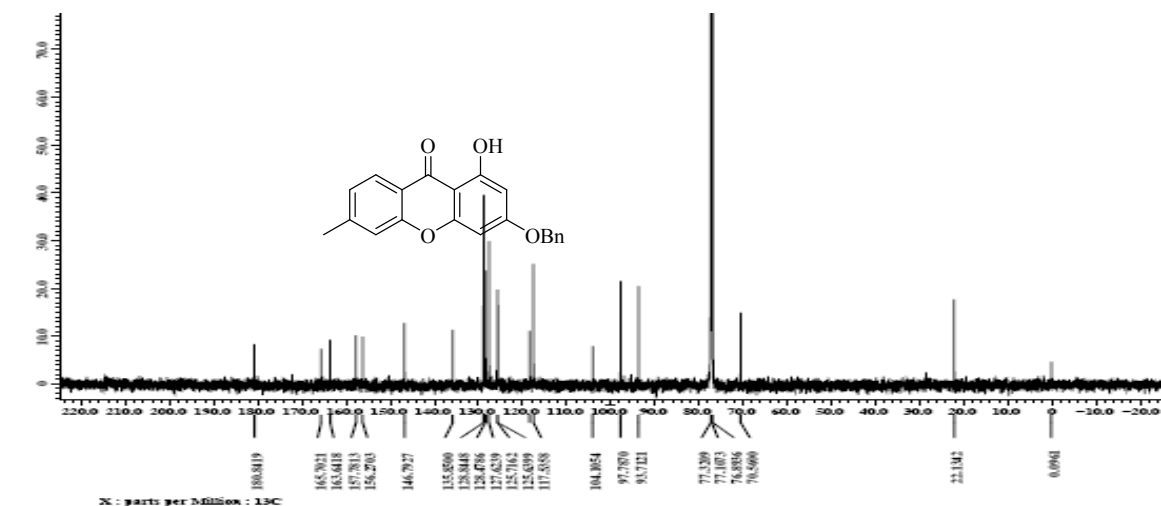

<sup>13</sup>C NMR spectra of compound of 21

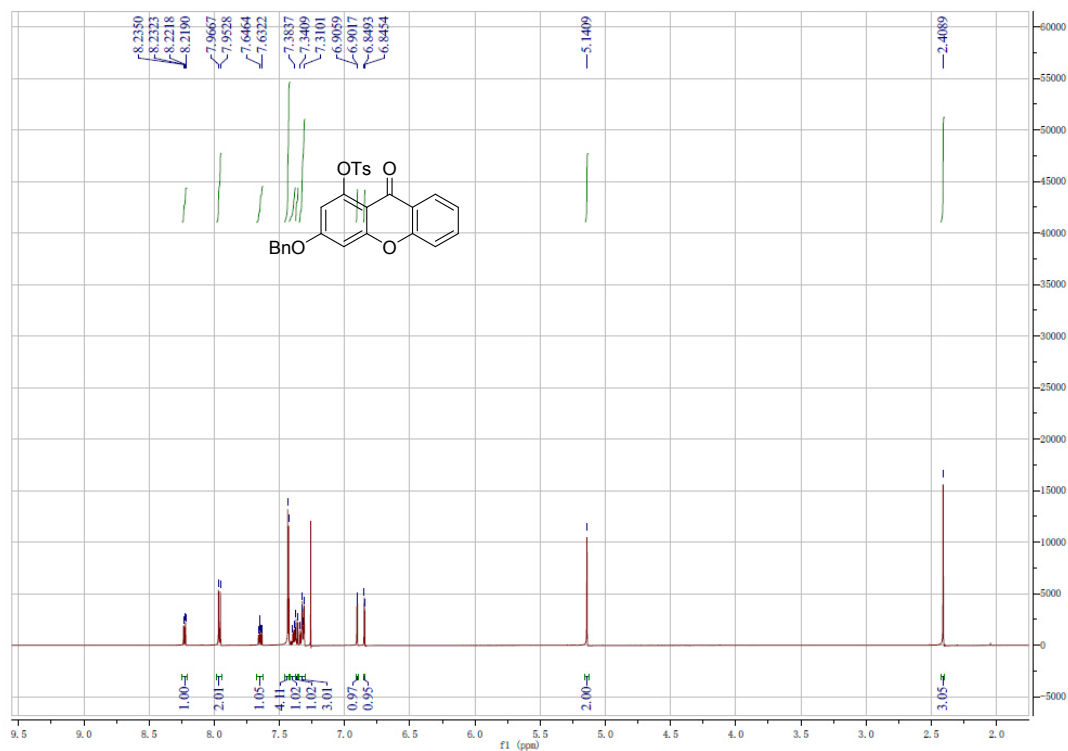

<sup>1</sup>H NMR spectra of compound of 22

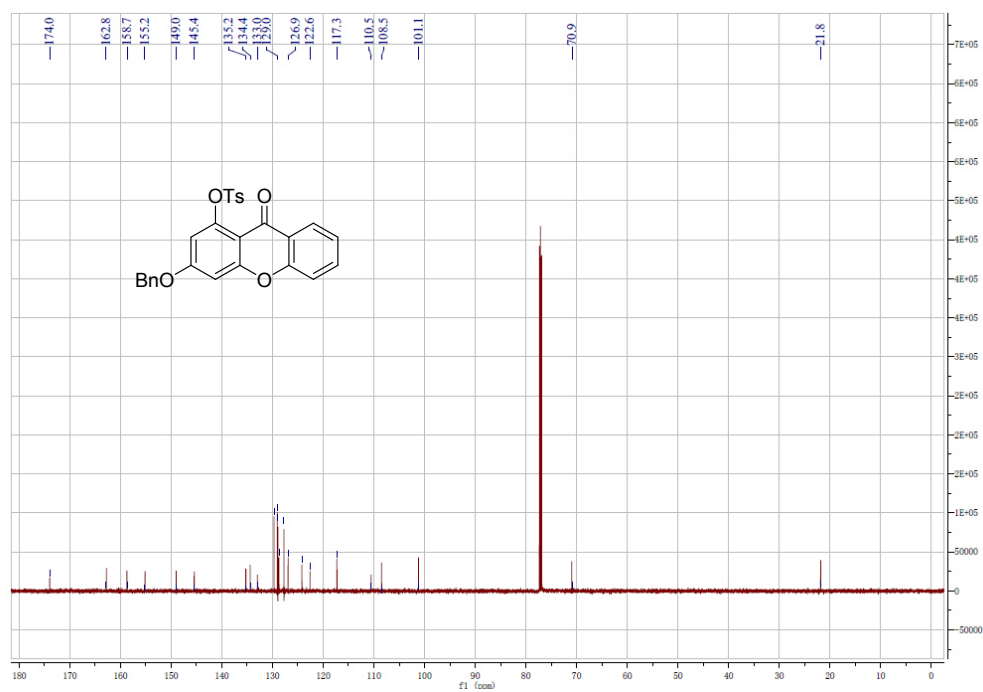

<sup>13</sup>C NMR spectra of compound of 22

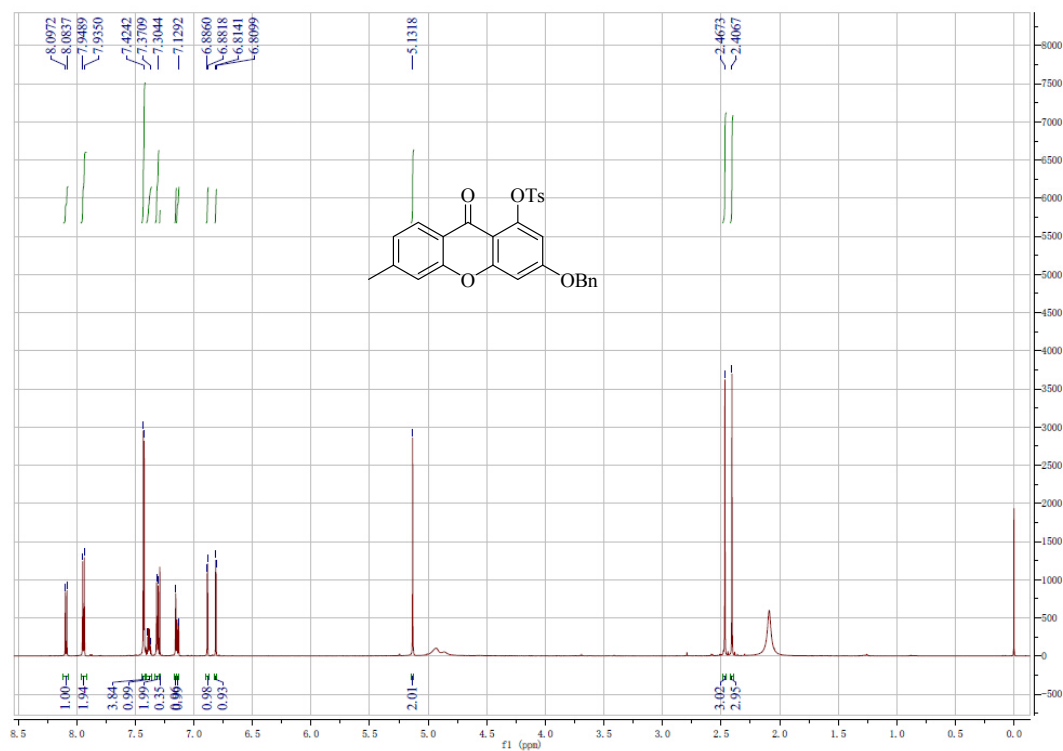

<sup>1</sup>H NMR spectra of compound of **23**

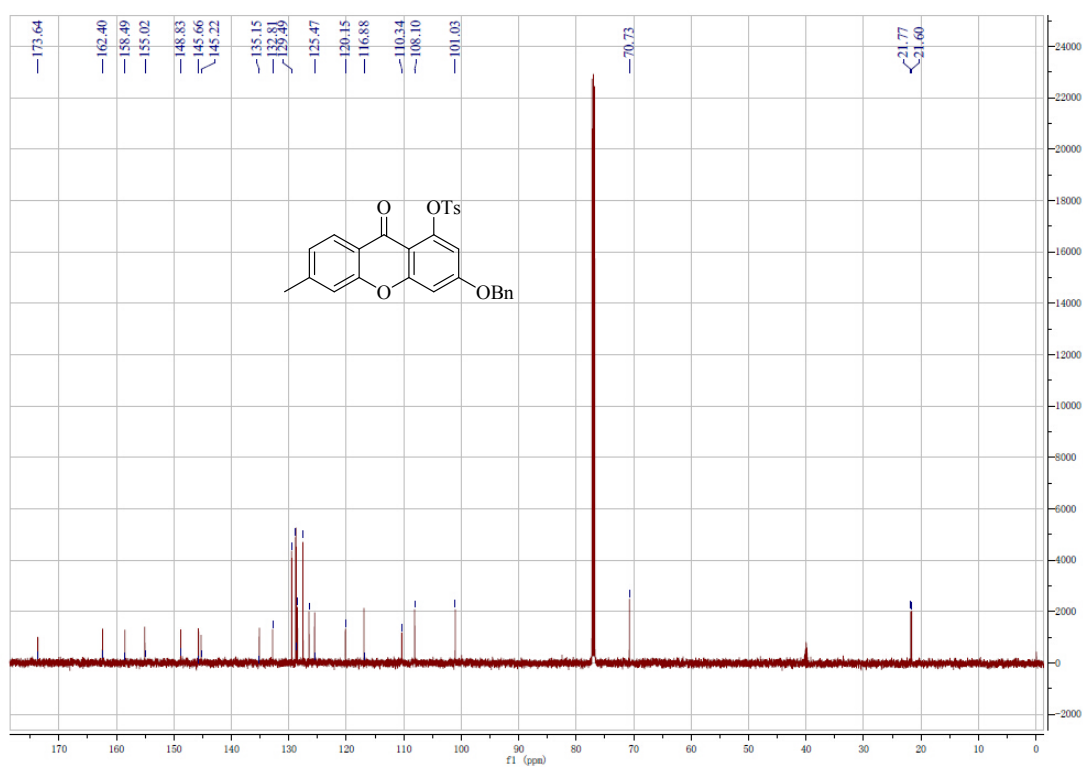

<sup>13</sup>C NMR spectra of compound of **23**



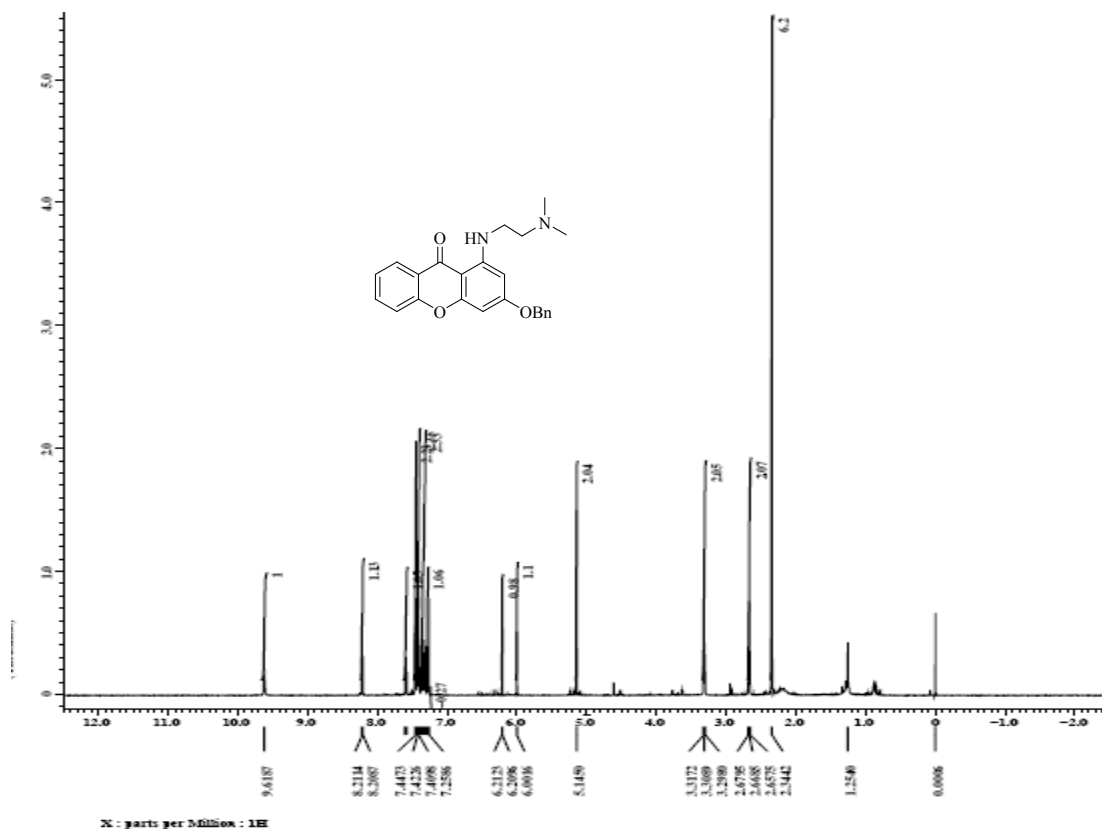

<sup>1</sup>H NMR spectra of compound of 24

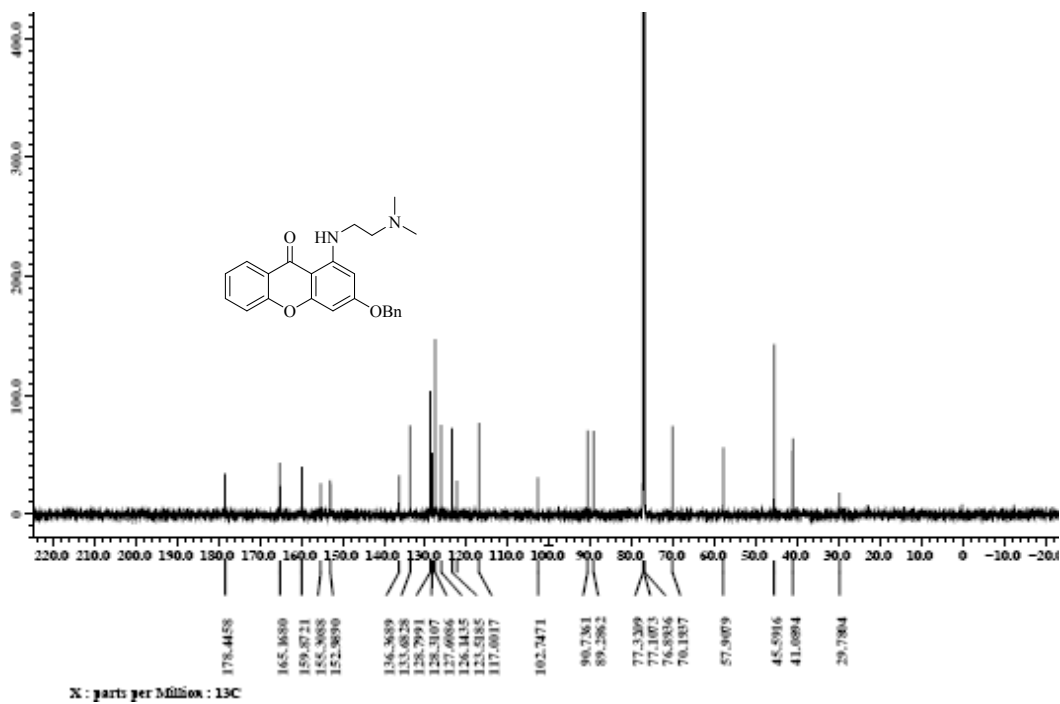

<sup>13</sup>C NMR spectra of compound of 24

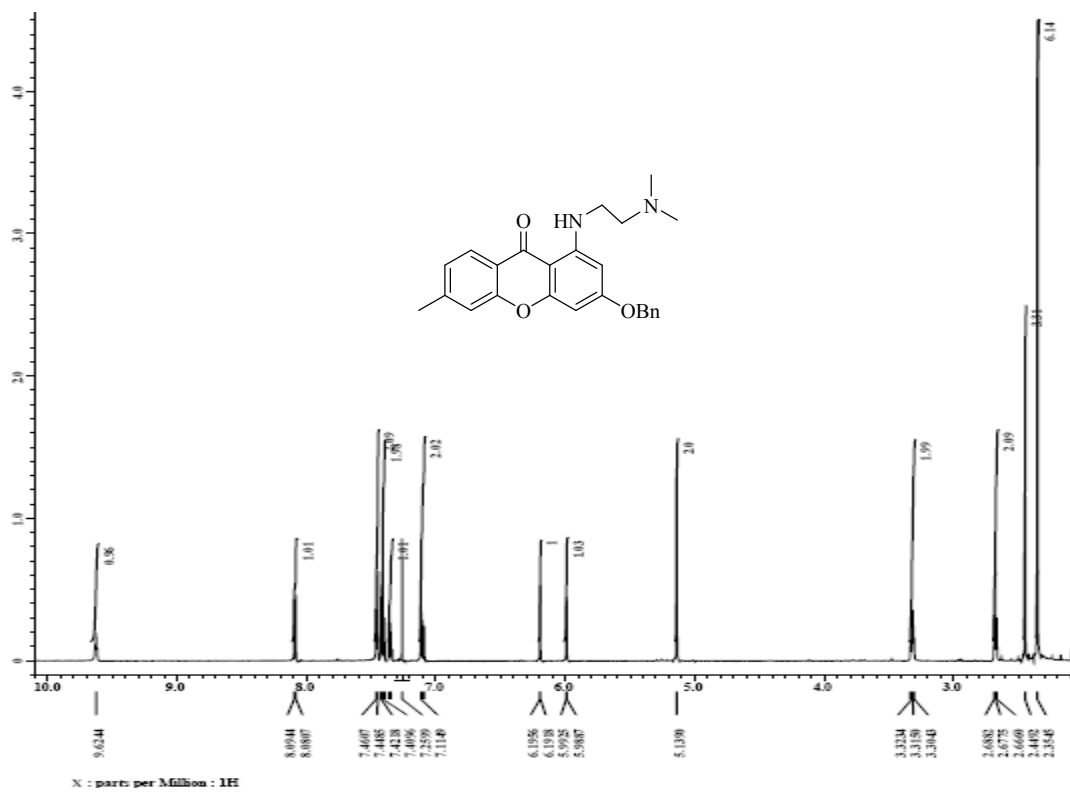

<sup>1</sup>H NMR spectra of compound of **25**

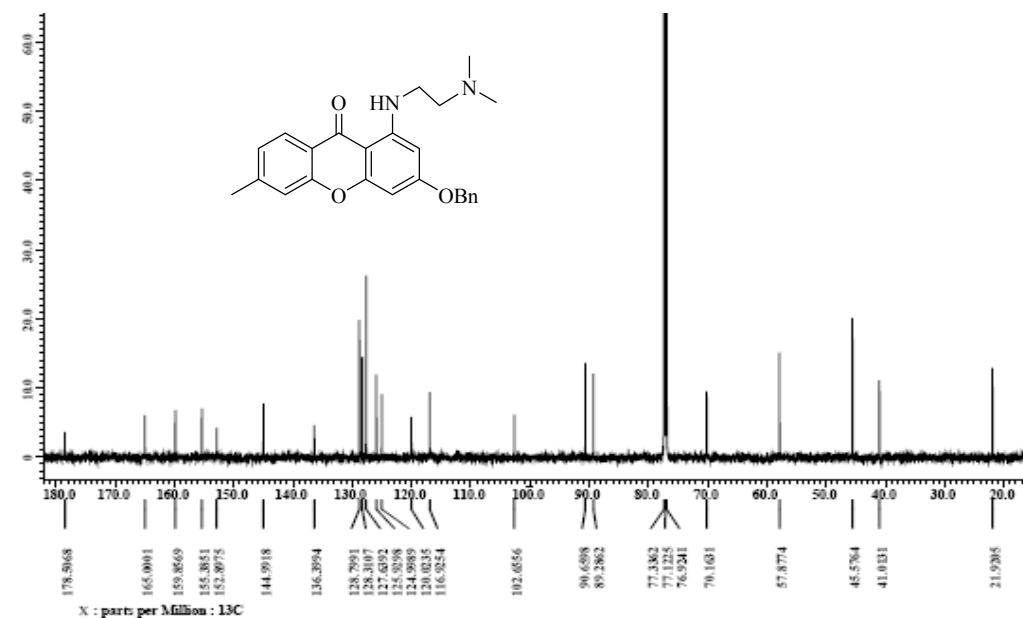

<sup>13</sup>C NMR spectra of compound of **25**

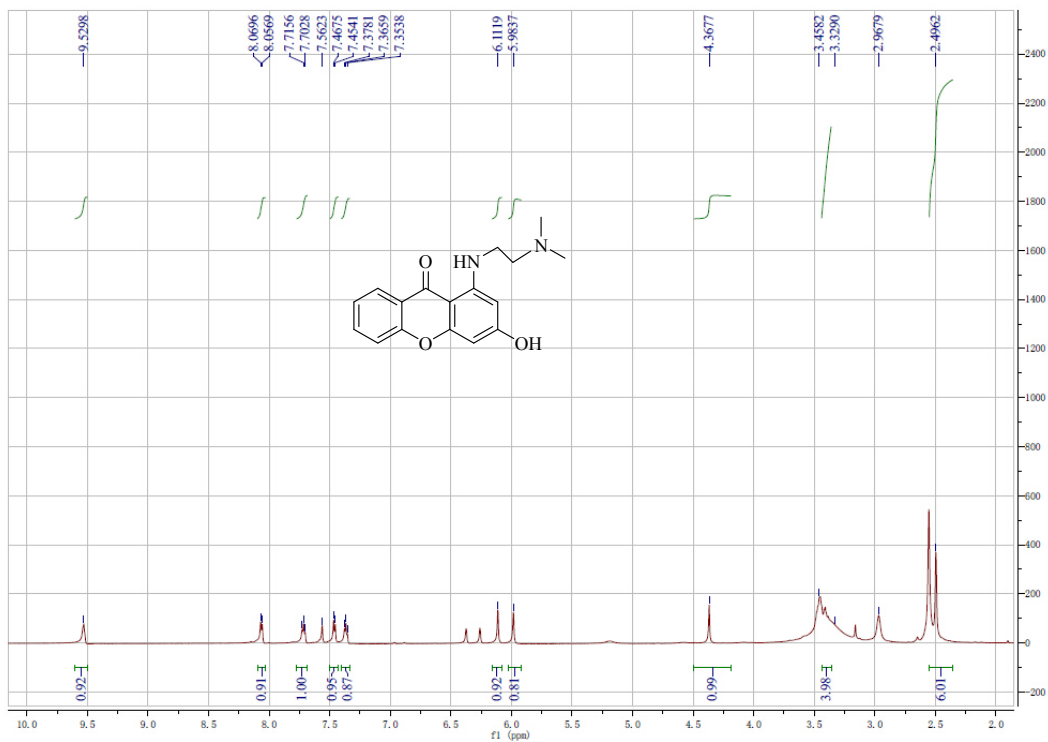

<sup>1</sup>H NMR spectra of compound of 26

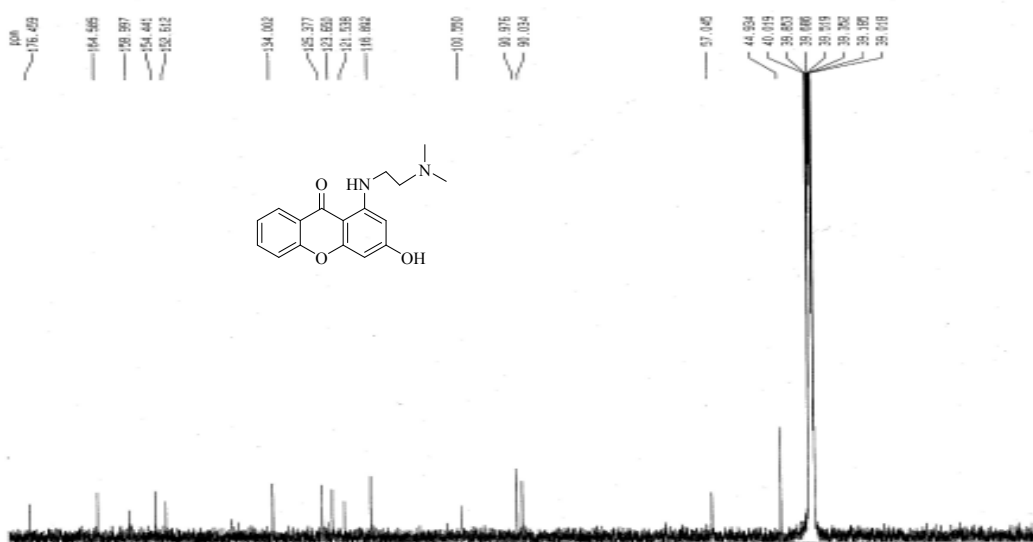

<sup>13</sup>C NMR spectra of compound of 26

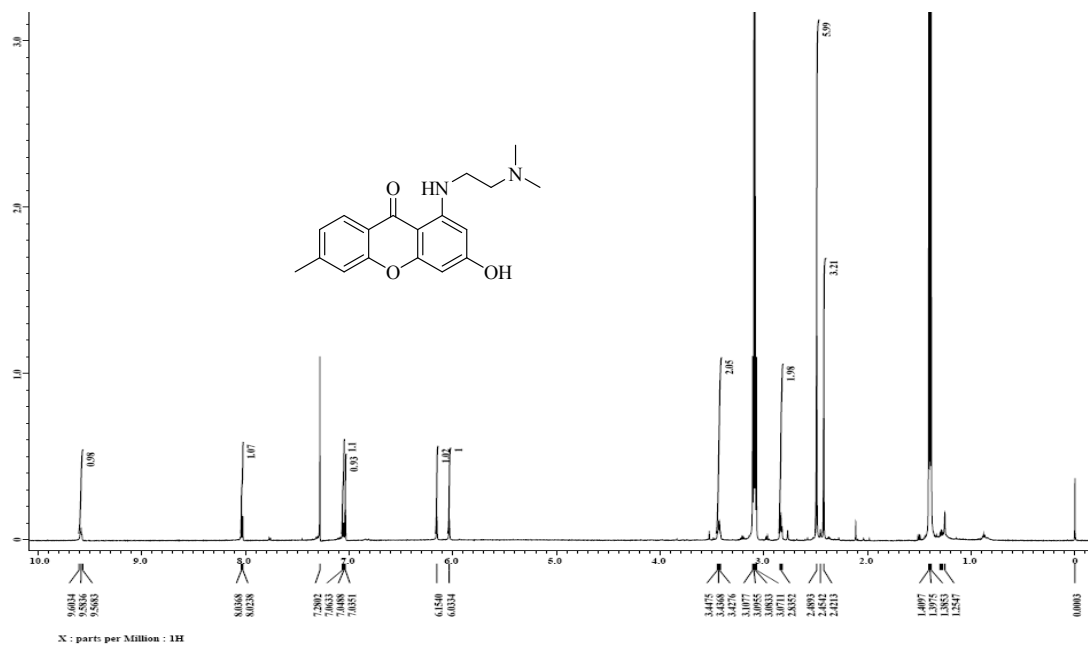

$^1\text{H}$  NMR spectra of compound of 27

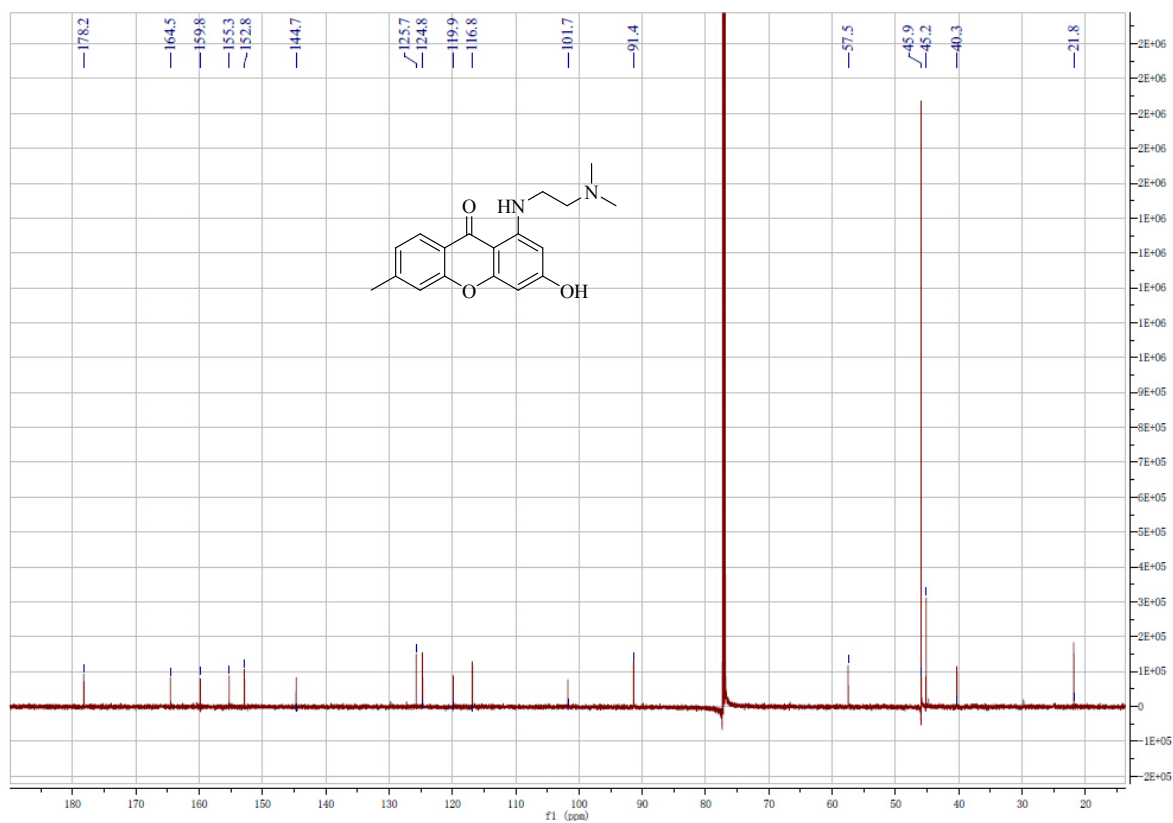

$^{13}\text{C}$  NMR spectra of compound of 27

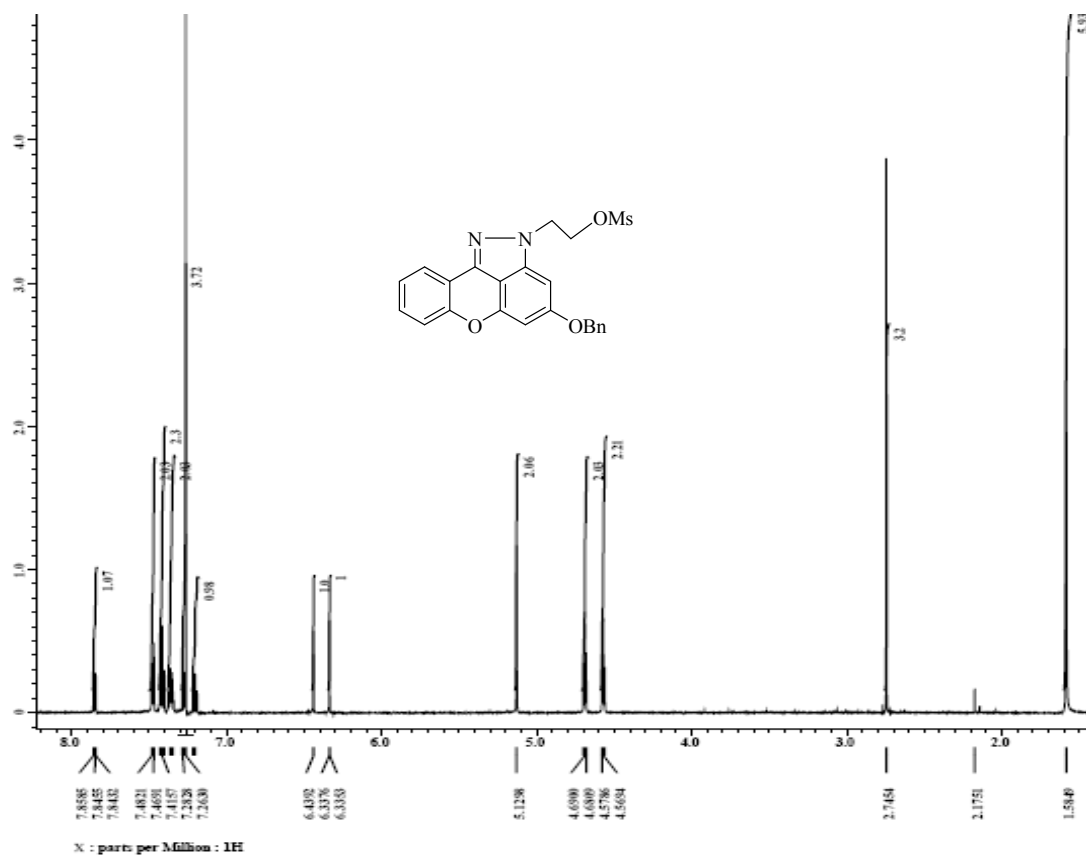

<sup>1</sup>H NMR spectra of compound of 28

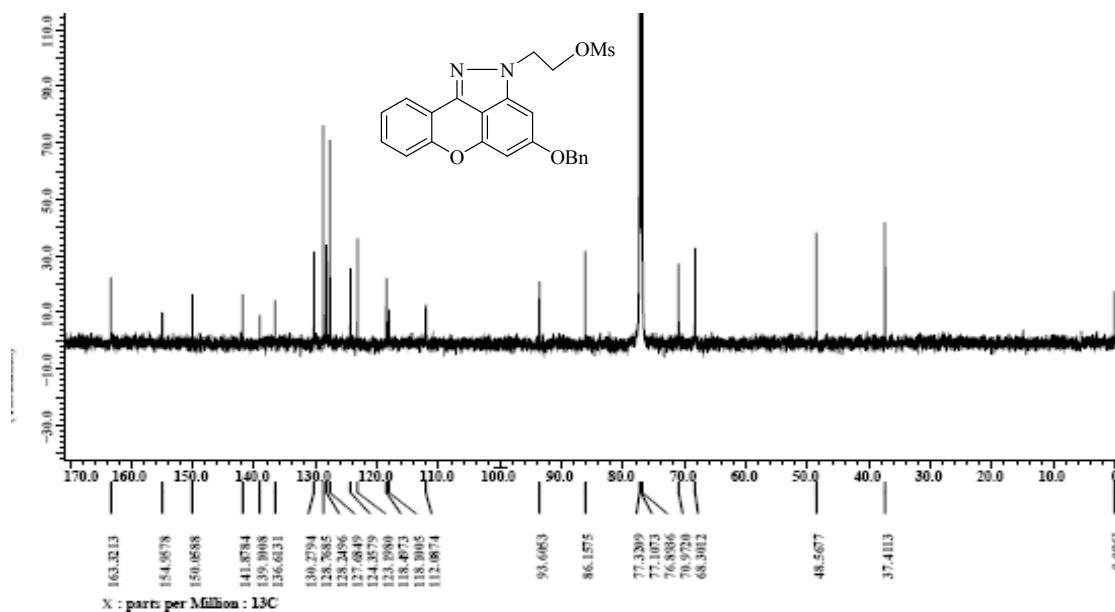

<sup>13</sup>C NMR spectra of compound of 28

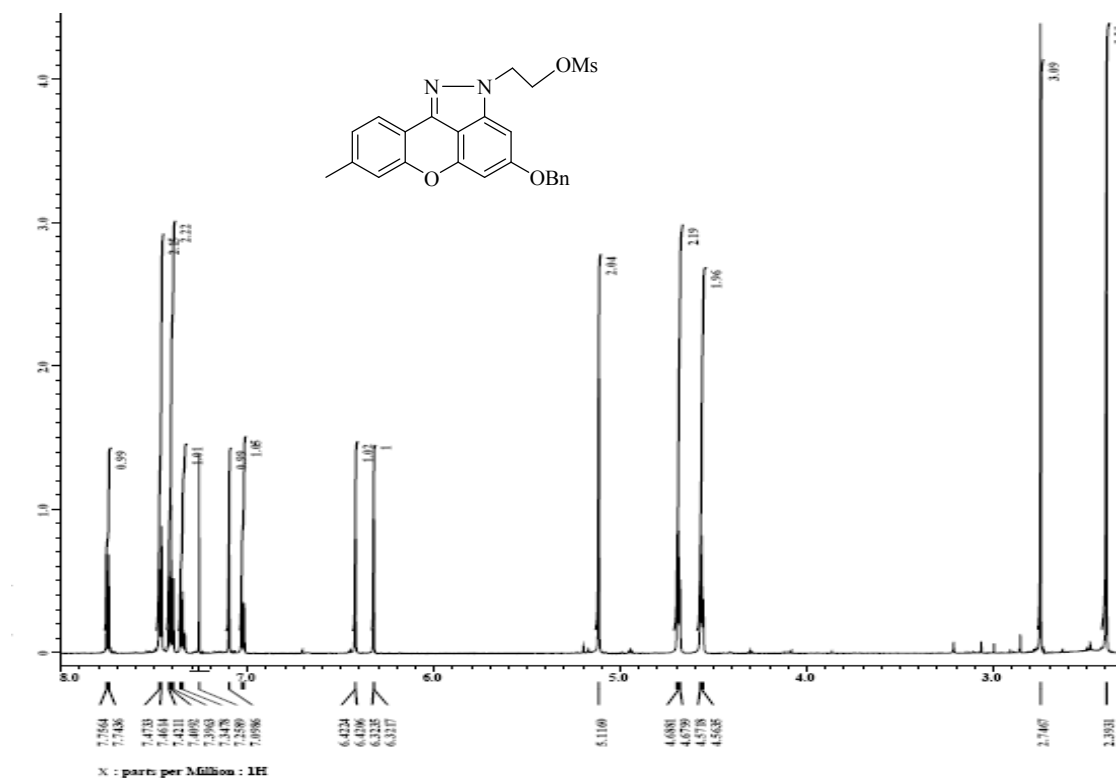

<sup>1</sup>H NMR spectra of compound of 29

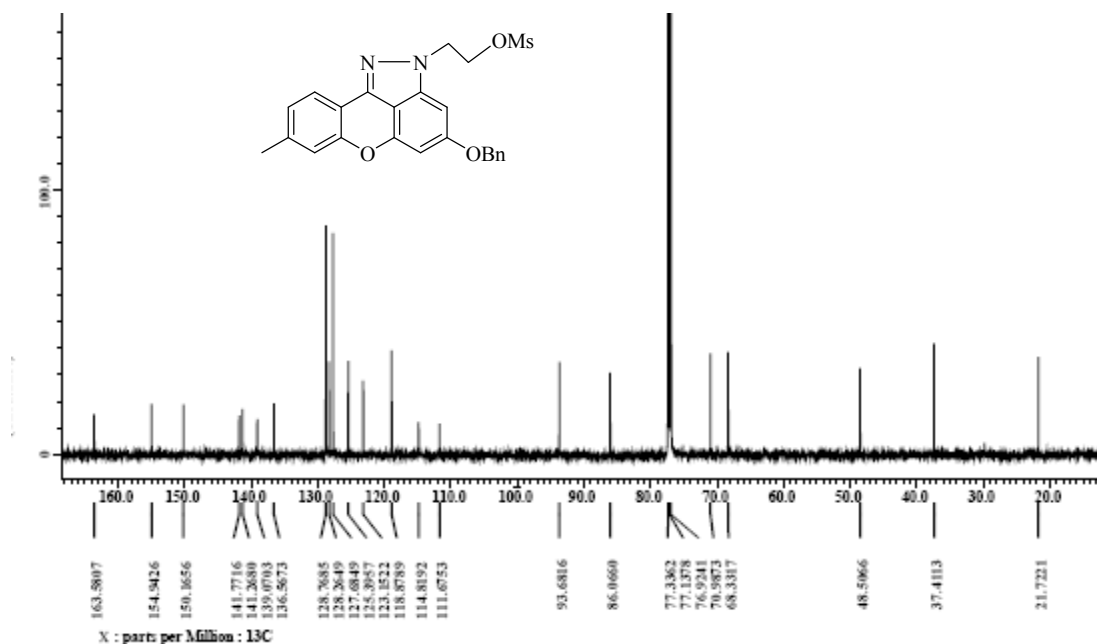

<sup>13</sup>C NMR spectra of compound of 29

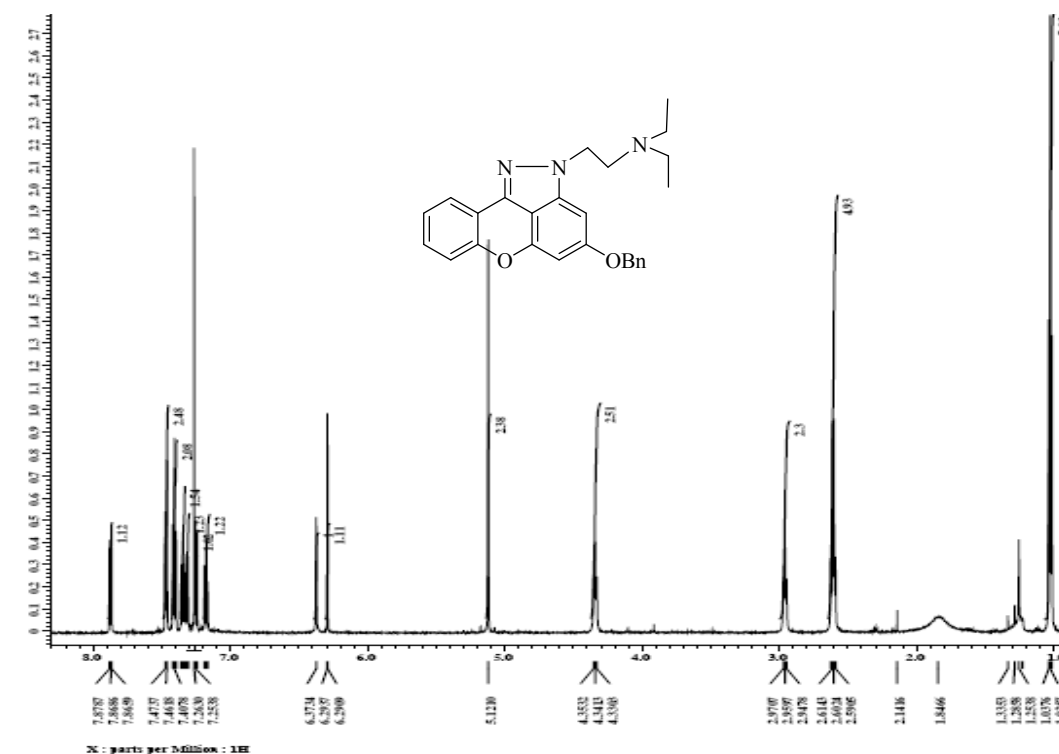

<sup>1</sup>H NMR spectra of compound of 30

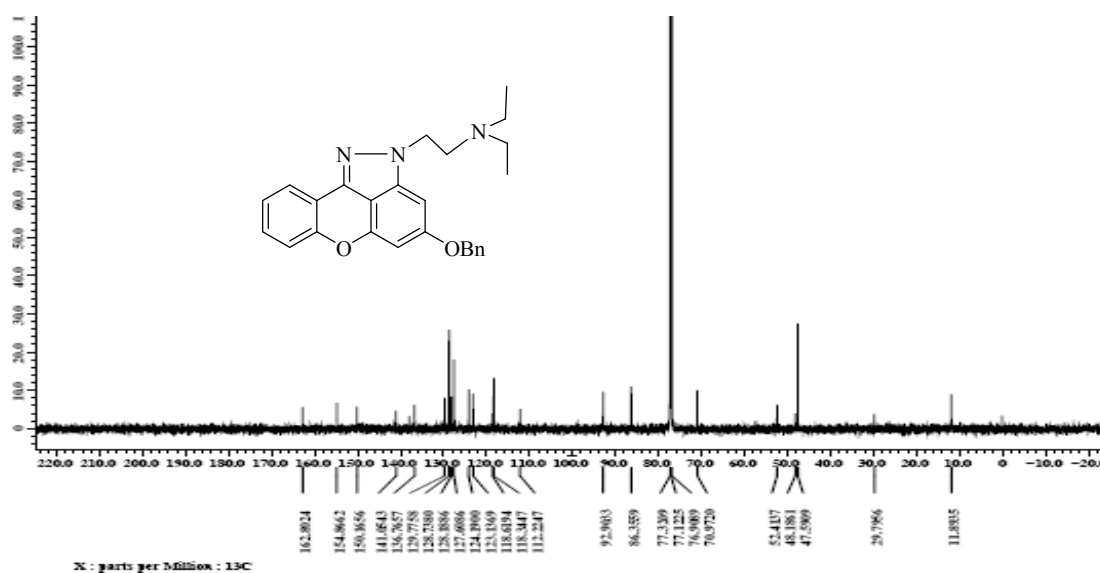

<sup>13</sup>C NMR spectra of compound of 30

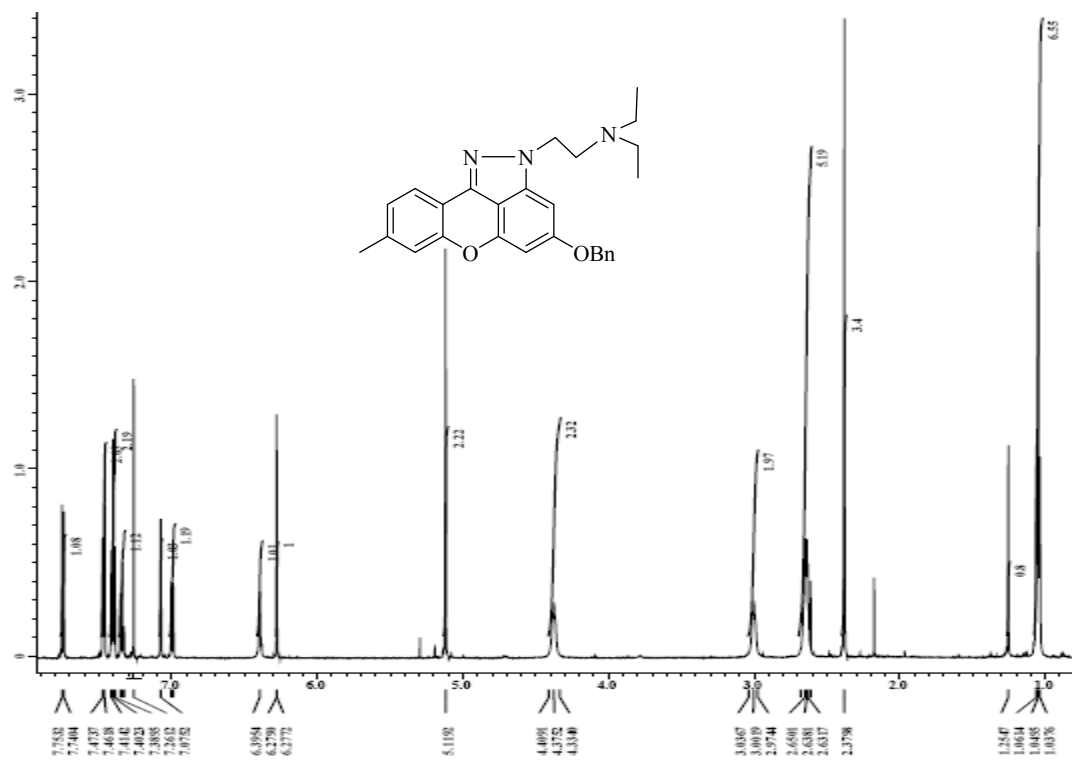

<sup>1</sup>H NMR spectra of compound of **31**

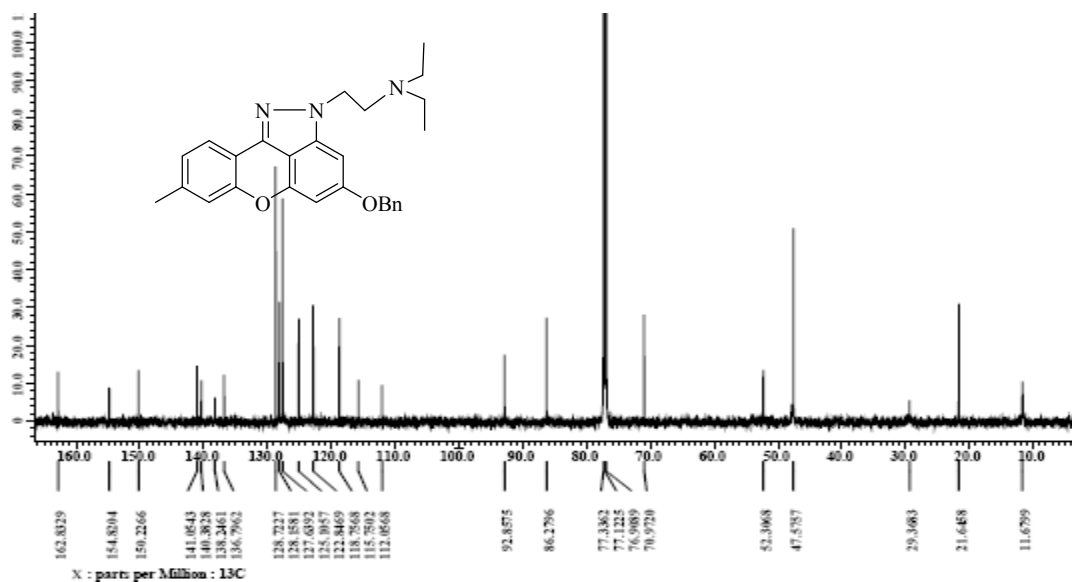

<sup>13</sup>C NMR spectra of compound of **31**



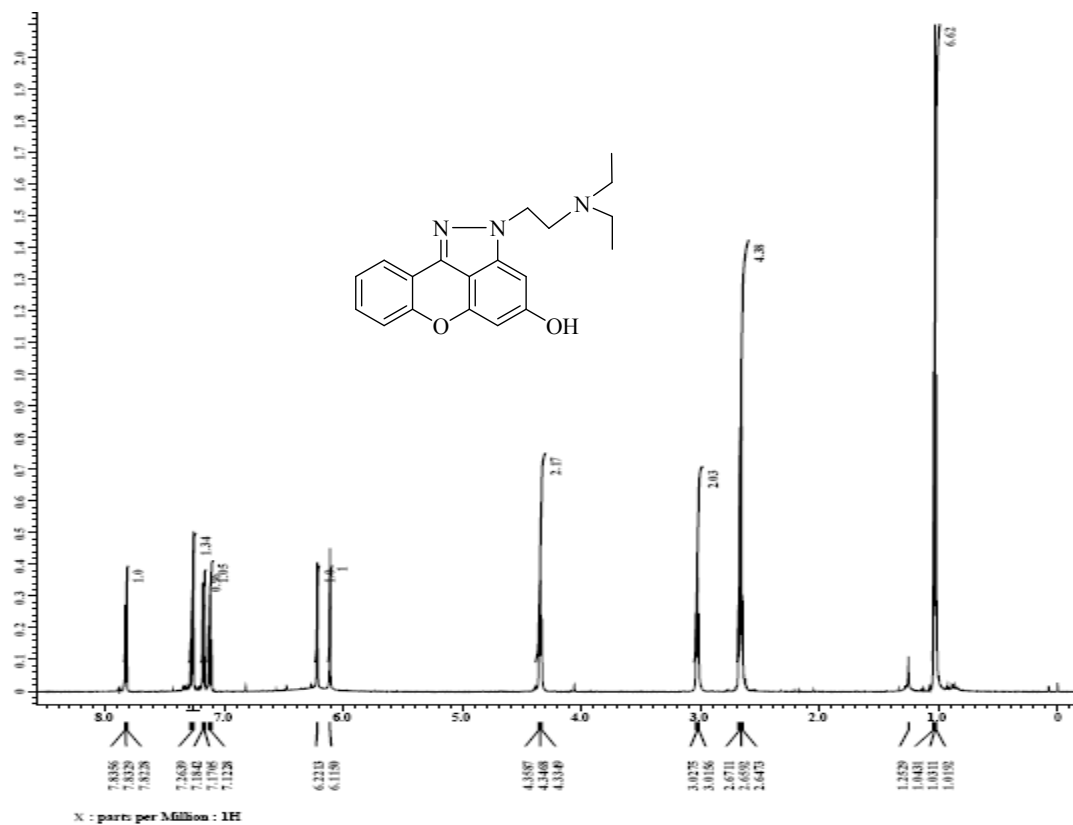

<sup>1</sup>H NMR spectra of compound of **32**

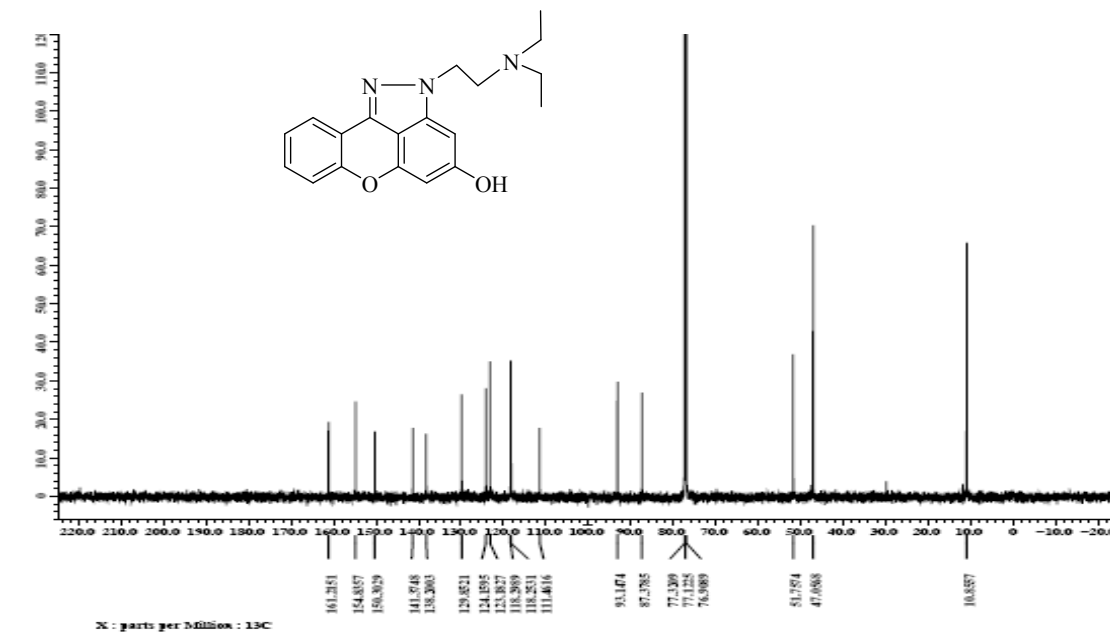

<sup>13</sup>C NMR spectra of compound of **32**

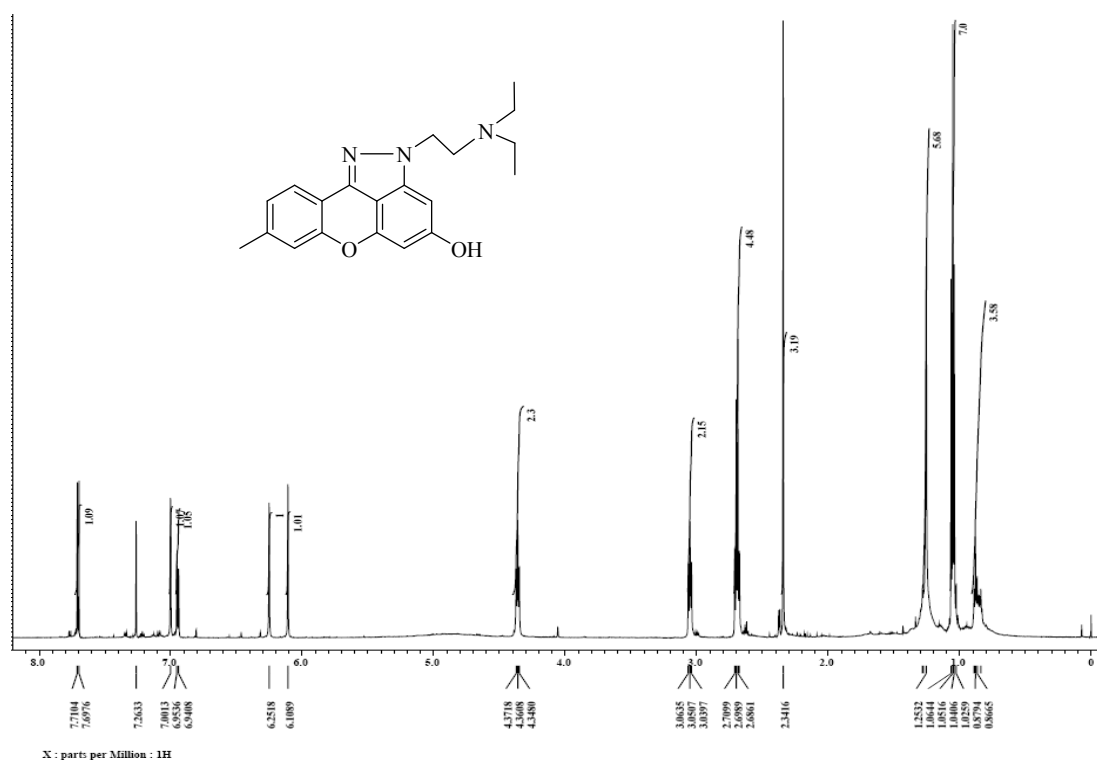

<sup>1</sup>H NMR spectra of compound of 33

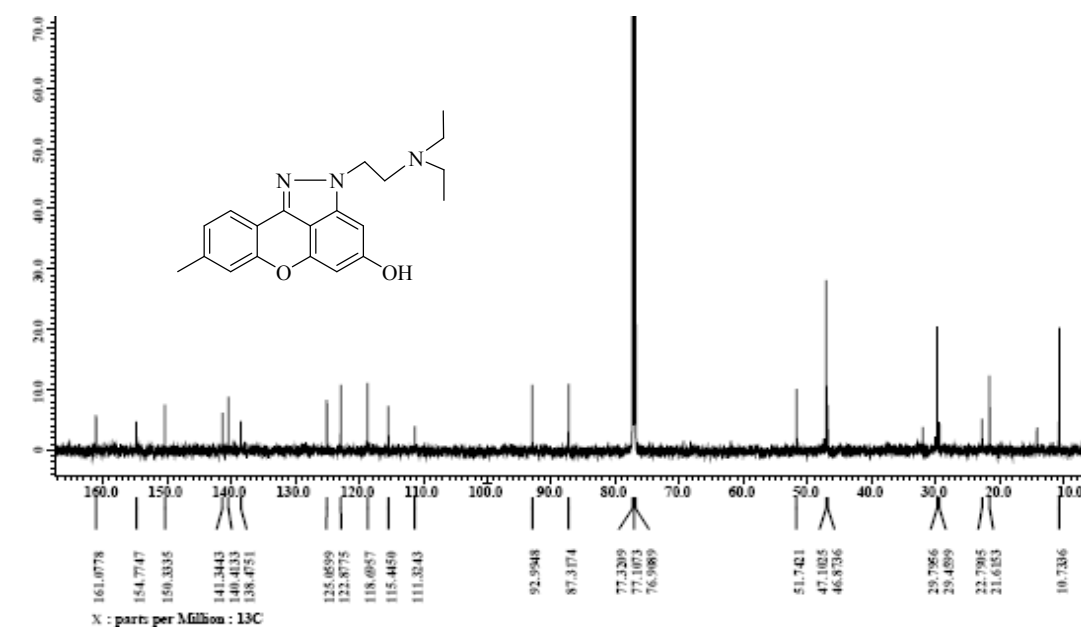

<sup>13</sup>C NMR spectra of compound of 33

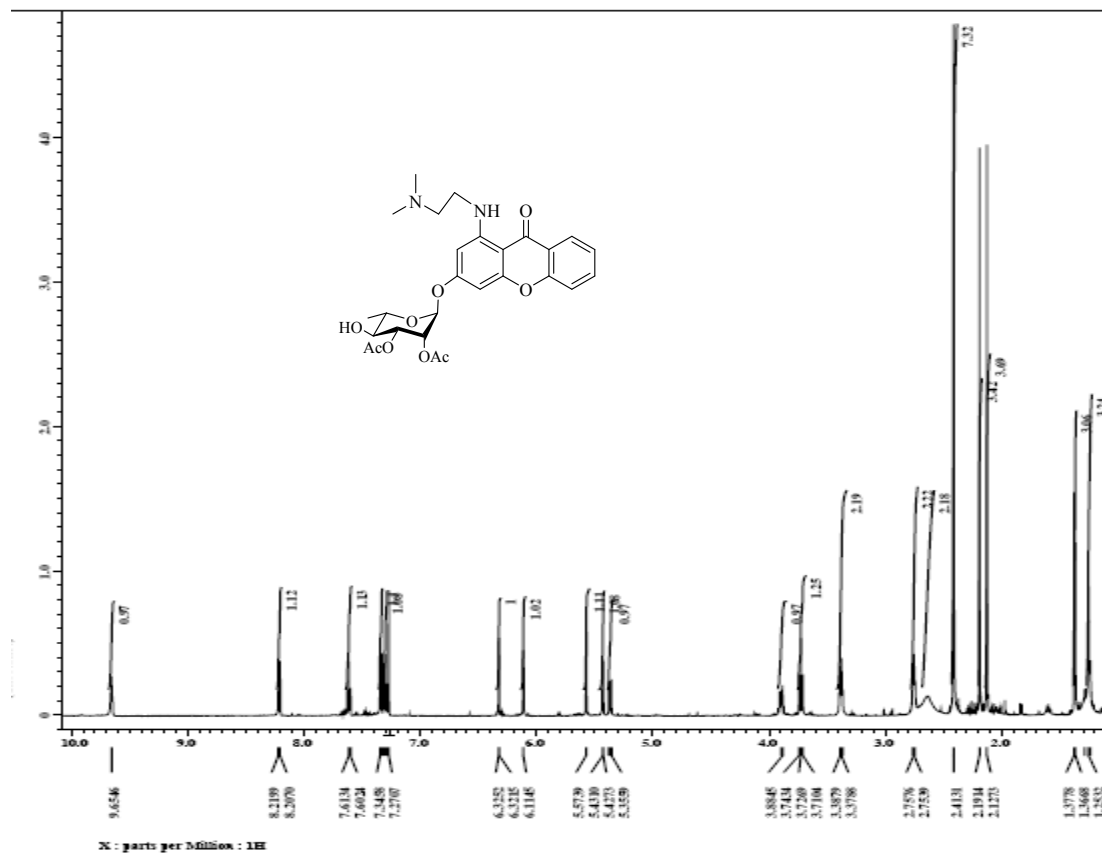

<sup>1</sup>H NMR spectra of compound of 8

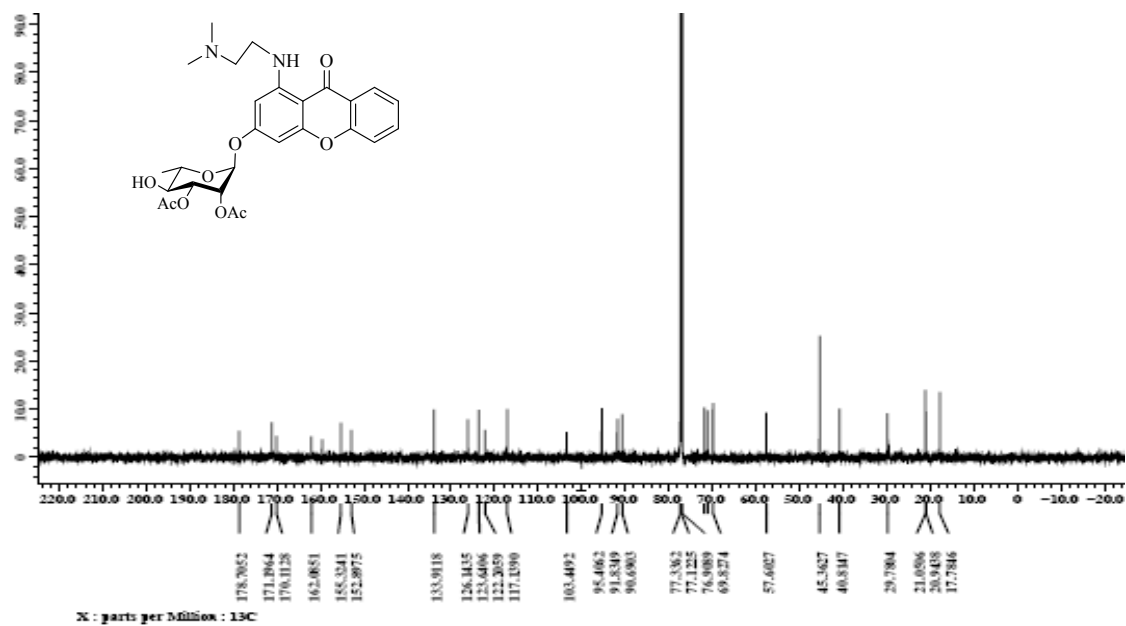

<sup>13</sup>C NMR spectra of compound of 8

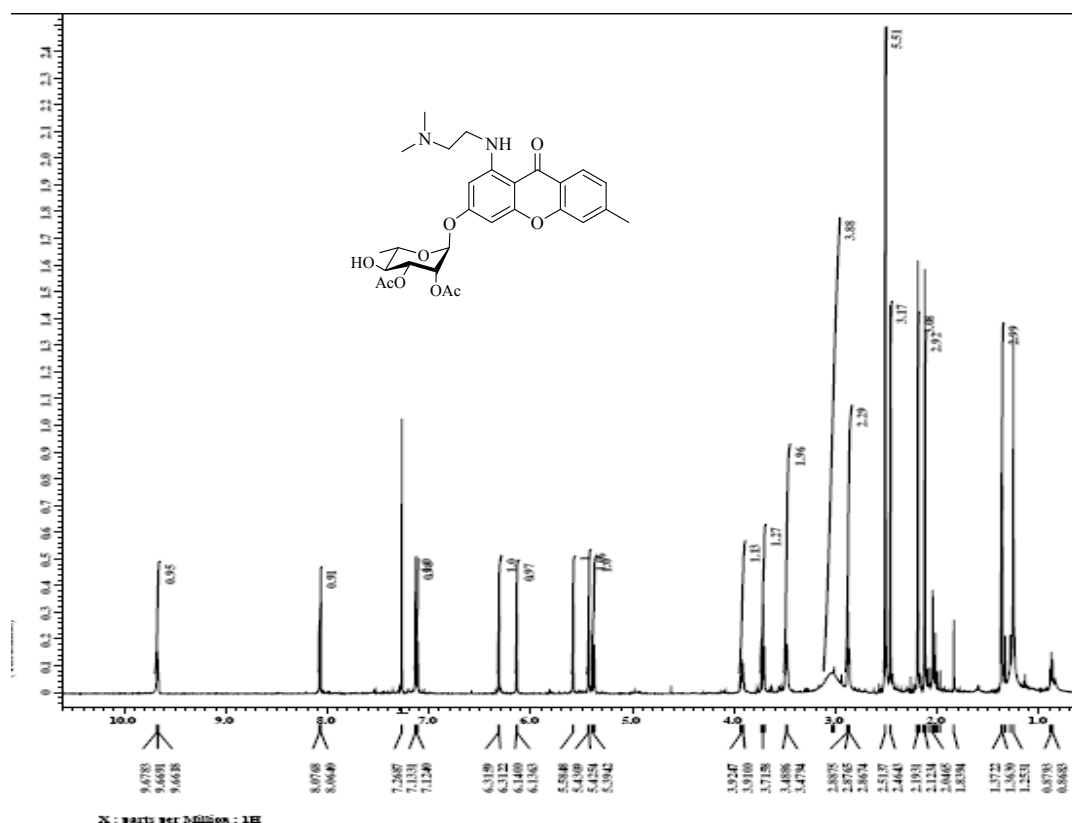

<sup>1</sup>H NMR spectra of compound of 9

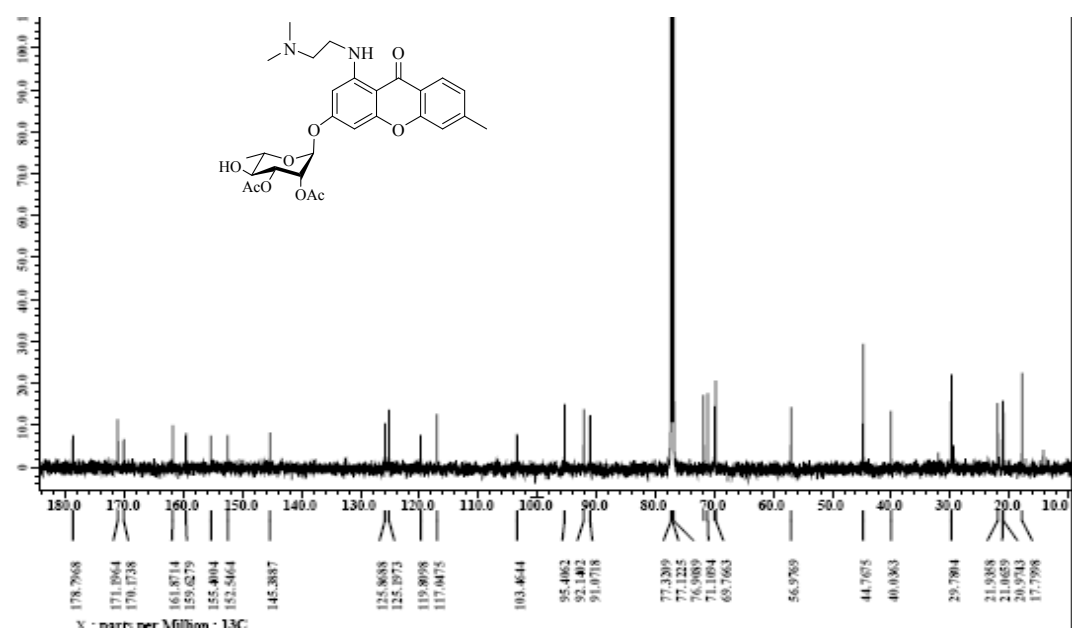

<sup>13</sup>C NMR spectra of compound of 9

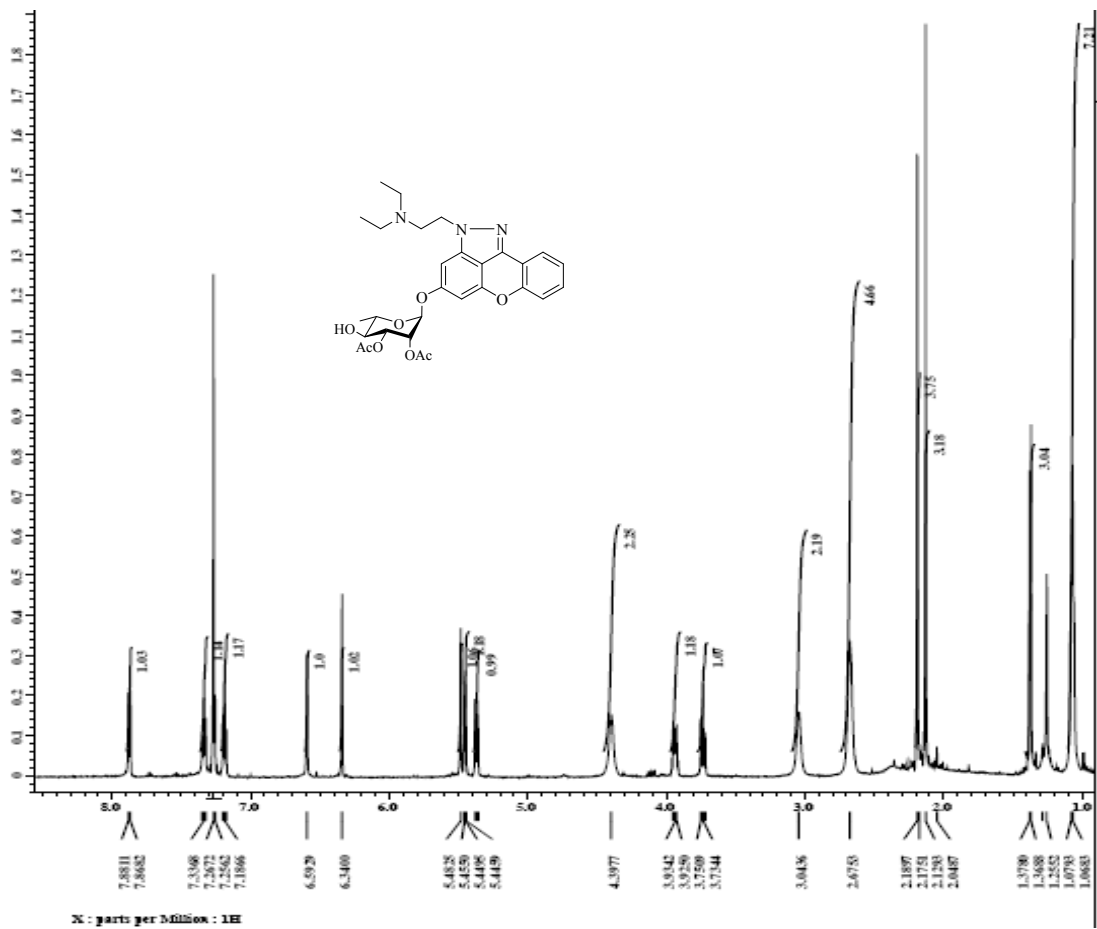

<sup>1</sup>H NMR spectra of compound of 10

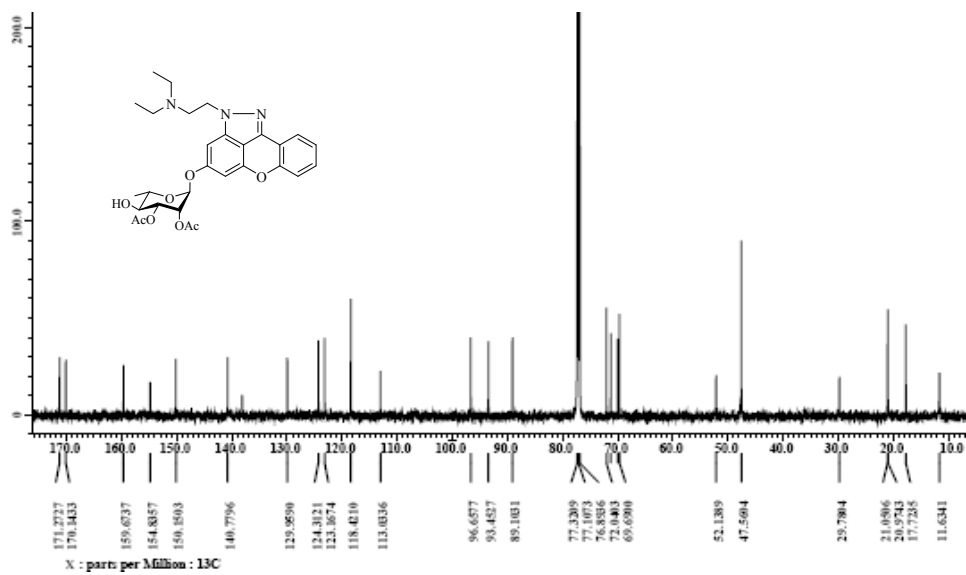

<sup>13</sup>C NMR spectra of compound of 10

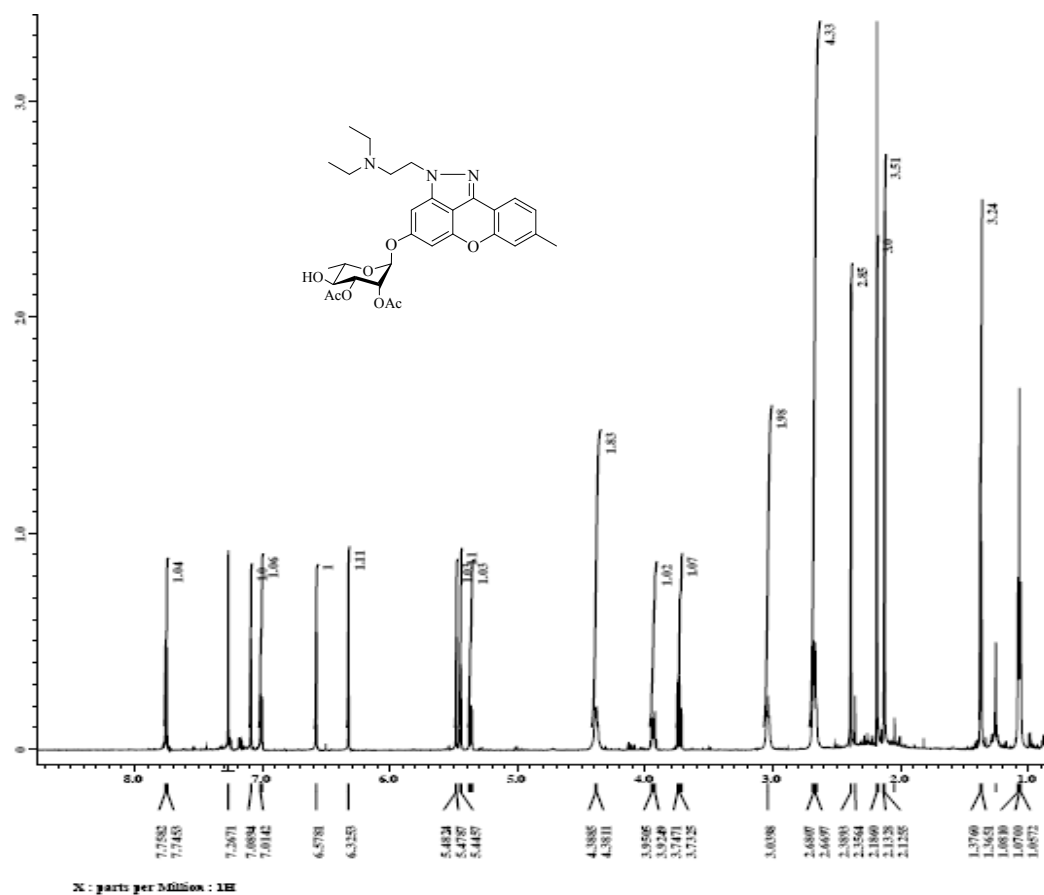

<sup>1</sup>H NMR spectra of compound of 11

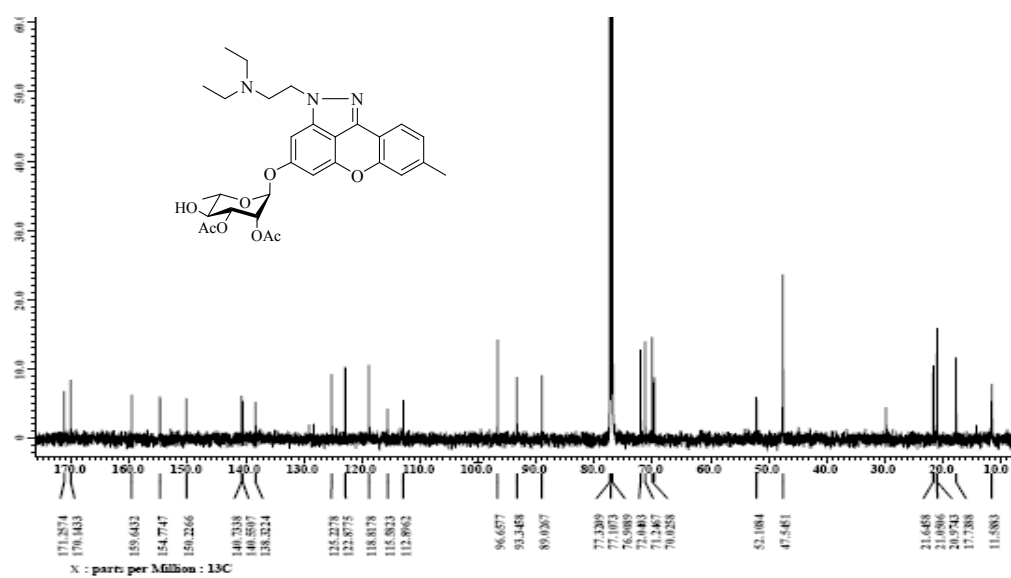

<sup>13</sup>C NMR spectra of compound of 11
